# Supplementary material for: Application of optically active chiral bis(imidazolium) salts as potential receptors of chiral dicarboxylate salts of biological relevance
Source: Royal Society of Chemistry journal article supplement (doi:10.1039/c5ob00348b), 2015-01-01
Supplement: c5ob00348b1.pdf [file c5ob00348b1.pdf]

*Supporting information for*

**Application of optically active chiral bis(imidazolium) salts as potential receptors of chiral dicarboxylate salts of biological relevance**

Laura González-Mendoza,<sup>a</sup> Jorge Escorihuela,<sup>b</sup> Belén Altava,<sup>\*,a</sup> M. Isabel Burguete,<sup>a</sup> and Santiago V. Luis<sup>\*,a</sup>

<sup>a</sup> Department of Inorganic and Organic Chemistry, Universitat Jaume I, Av. de Vicent Sos Baynat s/n, 12071 Castellón, Spain. E-mail: luiss@uji.es

<sup>b</sup> Laboratory of Organic Chemistry, Wageningen University, Dreijenplein 8, 6703 HB, Wageningen, the Netherlands.

**Table of contents:**

|                                                                                                        |     |
|--------------------------------------------------------------------------------------------------------|-----|
| <sup>1</sup> H and <sup>13</sup> C NMR of all the described compounds                                  | S2  |
| gCOSY spectra for the bis(imidazolium) salt <b>3a</b>                                                  | S8  |
| <sup>1</sup> H NMR spectra in CDCl <sub>3</sub> of <b>3a</b> and <b>5a</b> at different concentrations | S9  |
| TGA and first derivative of all the bis(imidazolium) salts                                             | S10 |
| DSC of all the bis(imidazolium) salts                                                                  | S12 |
| ATR-FTIR spectra of <b>3a-c</b> and <b>5a-c</b> salts at 25 °C                                         | S14 |
| <b>Table S1.</b> Maximum chemical induced shifts of selected receptor signals of <b>3a</b>             | S15 |
| <b>Table S2.</b> Maximum chemical induced shifts of selected receptor signals of <b>3b</b>             | S15 |
| <b>Table S3.</b> Maximum chemical induced shifts of selected receptor signals of <b>3c</b>             | S15 |
| Observed chemical shift changes with changing concentration of <b>5a-c</b> in CDCl <sub>3</sub>        | S15 |
| Observed chemical shift changes with changing concentration of <b>3a-c</b> in CDCl <sub>3</sub>        | S16 |
| Complexation curves of the receptors <b>3a-c</b> (8mM)                                                 | S17 |
| Fitting of the titration data                                                                          | S18 |
| Job plots of <b>3a</b> with L-aspartate and with D-aspartate                                           | S24 |
| NOESY and <sup>1</sup> H spectrums of <b>5c</b> and <b>3c</b>                                          | S25 |
| ATR-FTIR spectra of the 1:1 mixture <b>3a</b> :D-Asp and <b>3a</b> :L-AspTEA                           | S27 |
| DSC of <b>3a</b> :D-aspTEA complex and <b>3a</b> :L-AspTEA complex                                     | S28 |
| Theoretical calculations                                                                               | S29 |

## Copies of the NMR spectra of all the described compounds

5a

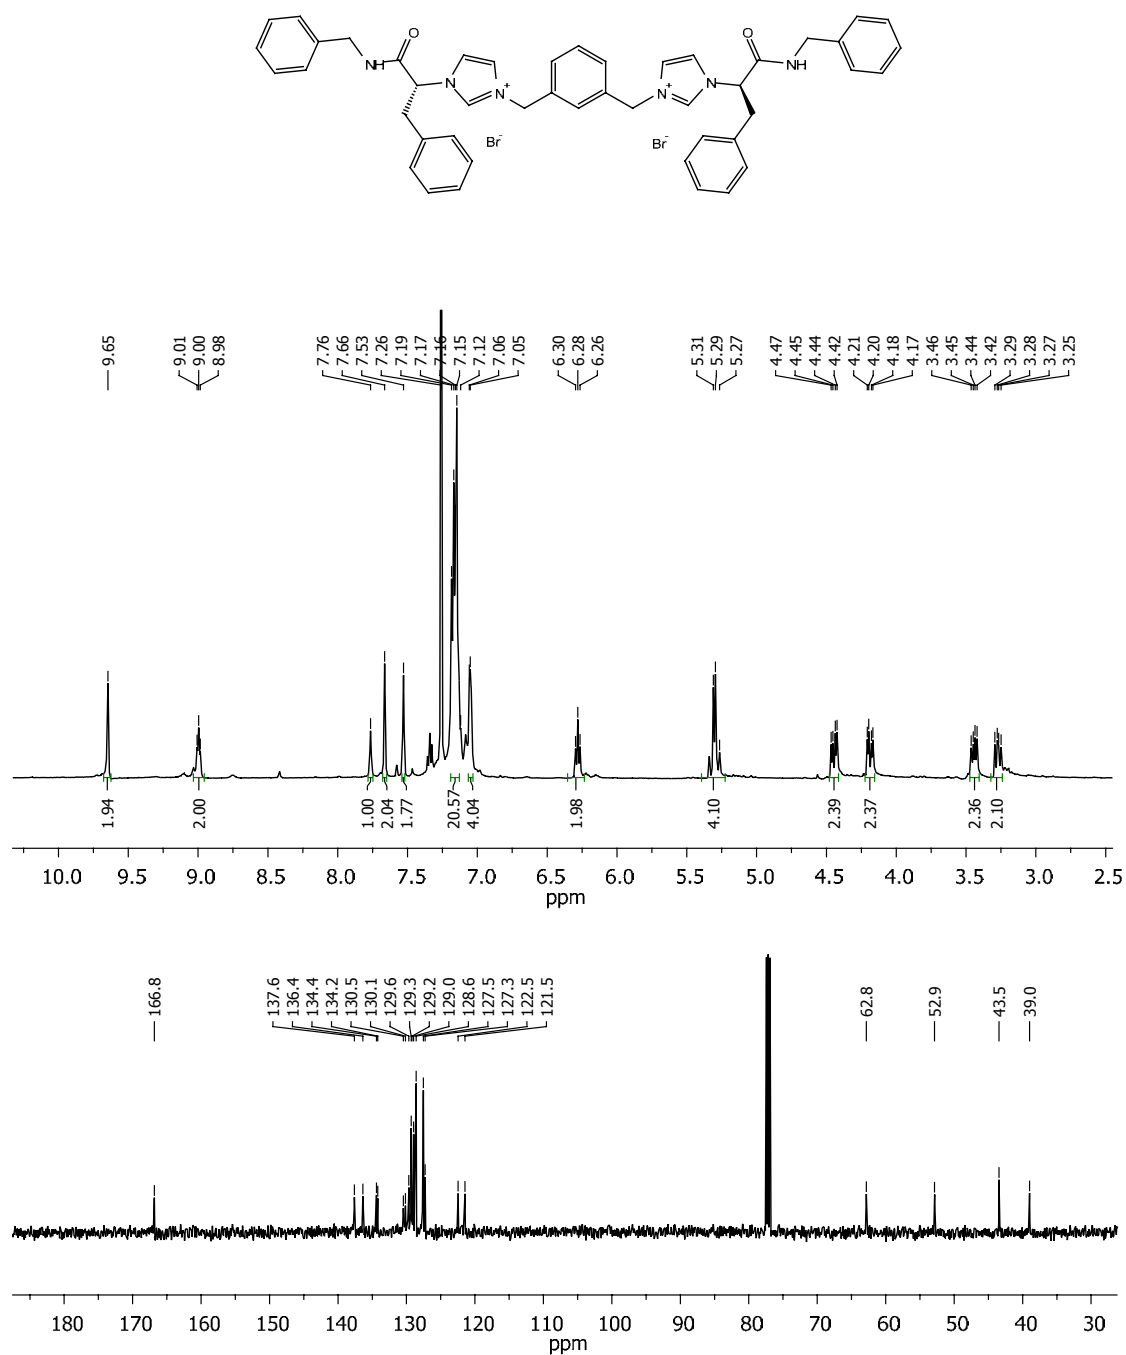

**Figure S1.** <sup>1</sup>H NMR spectra (upper trace) and <sup>13</sup>C NMR spectra (lower trace) for the bis(imidazolium) salt 5a (10 mM, CDCl<sub>3</sub>, 303 K).

5b

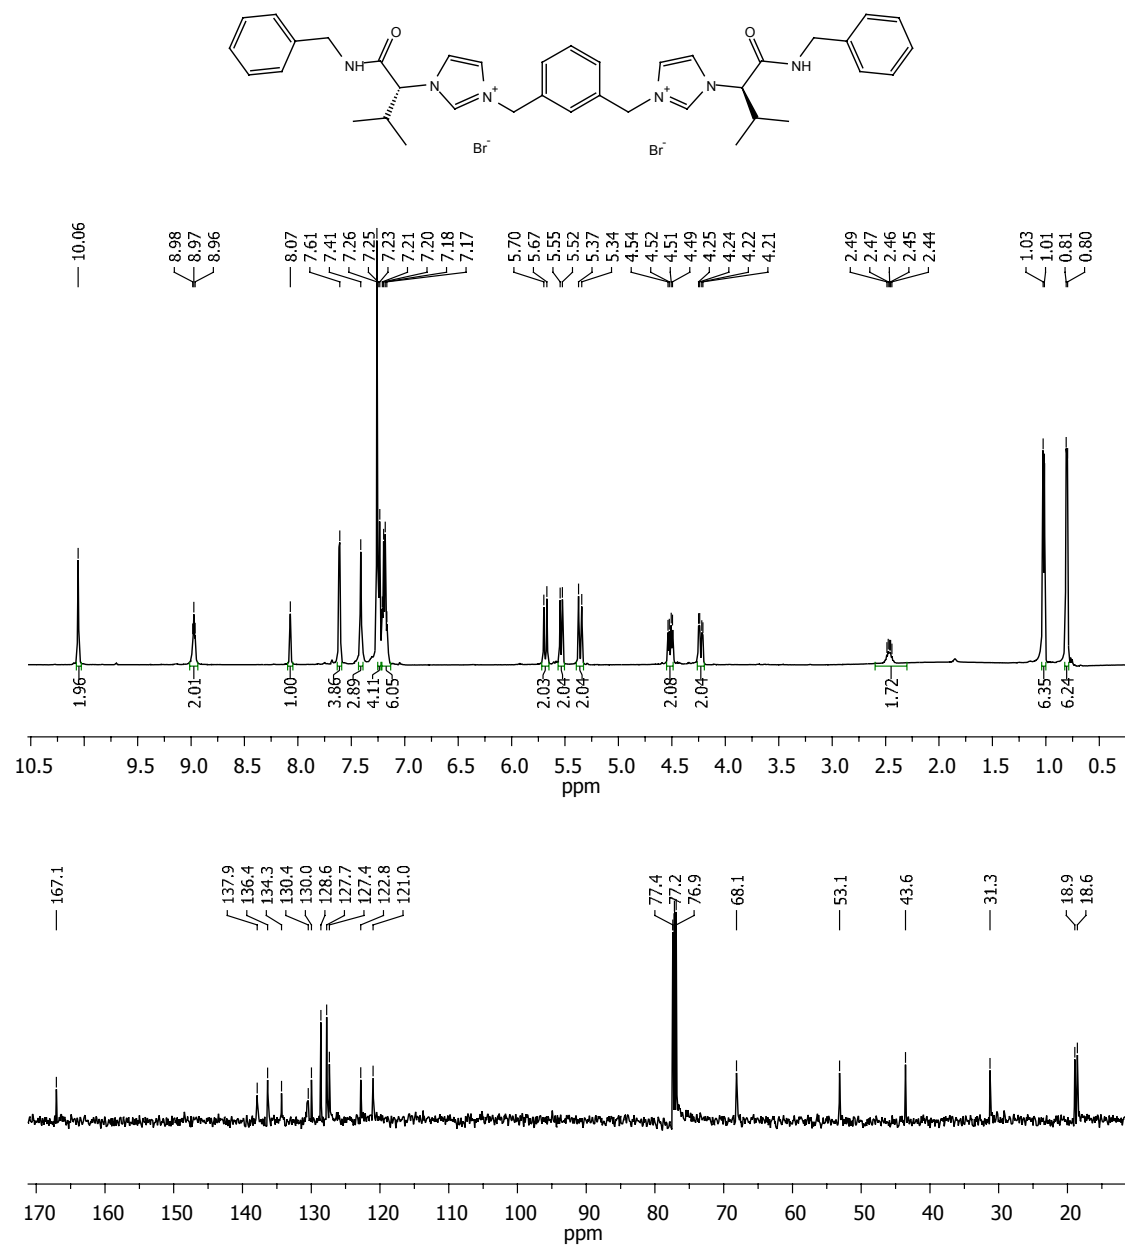

**Figure S2.** <sup>1</sup>H NMR spectra (upper trace) and <sup>13</sup>C NMR spectra (lower trace) for the bis(imidazolium) salt **5b** (10 mM, CDCl<sub>3</sub>, 303 K).

5c

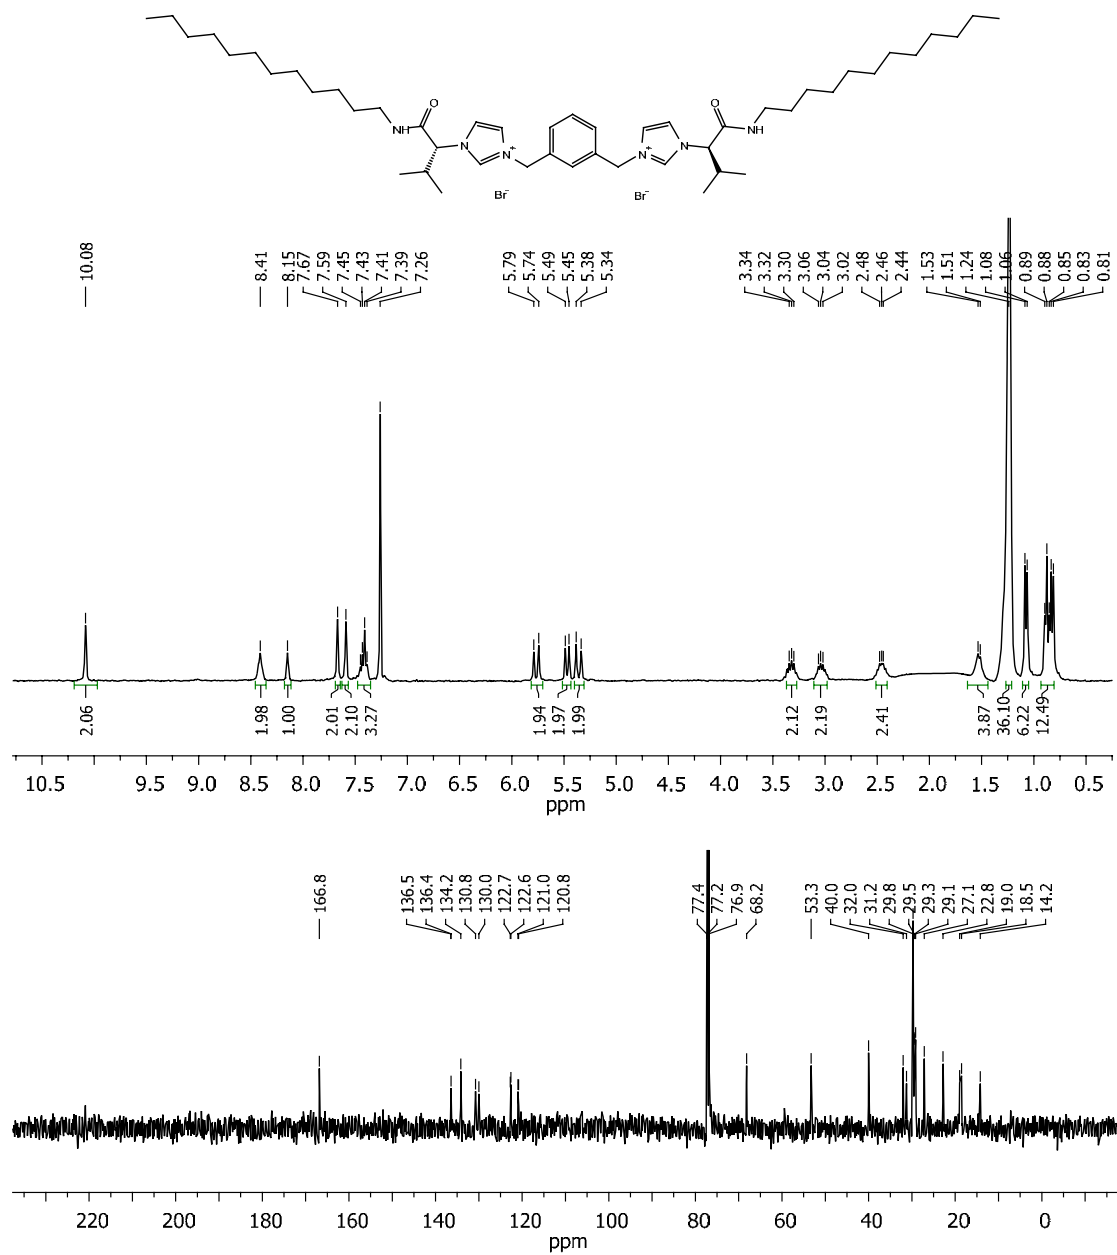

Figure S3. <sup>1</sup>H NMR spectra (upper trace) and <sup>13</sup>C NMR spectra (lower trace) for the bis(imidazolium) salt 5c (10 mM, CDCl<sub>3</sub>, 303 K).

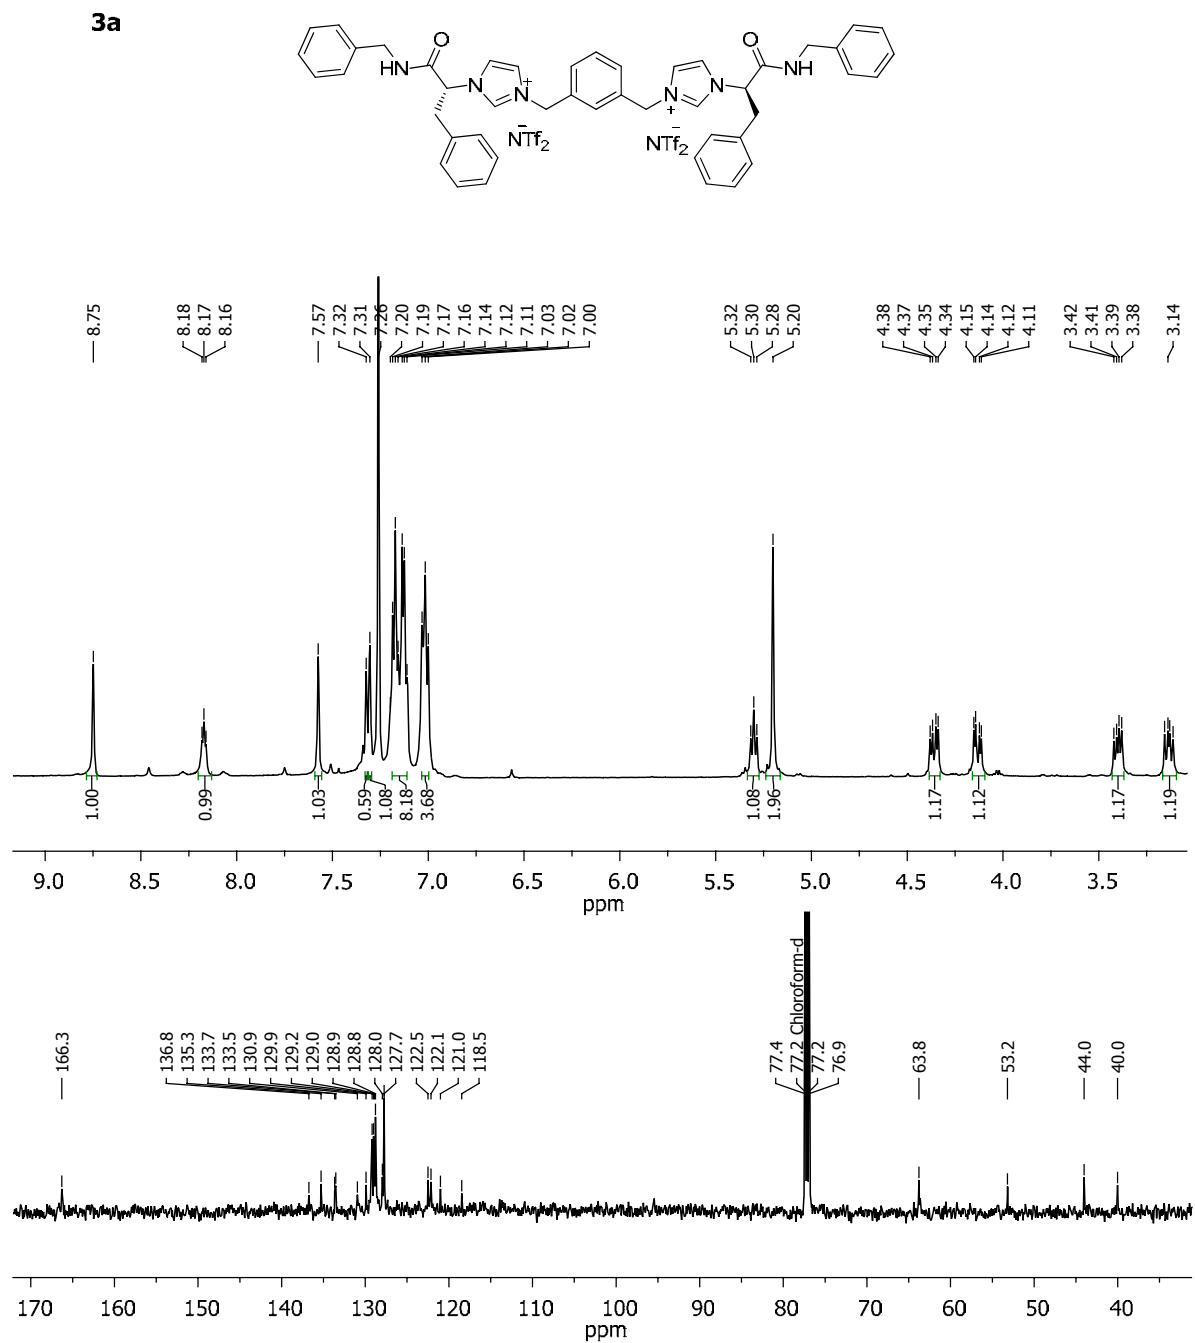

**Figure S4.** <sup>1</sup>H NMR spectra (upper trace) and <sup>13</sup>C NMR spectra (lower trace) for the bis(imidazolium) salt **3a** (10 mM, CDCl<sub>3</sub>, 303 K).

**3b**

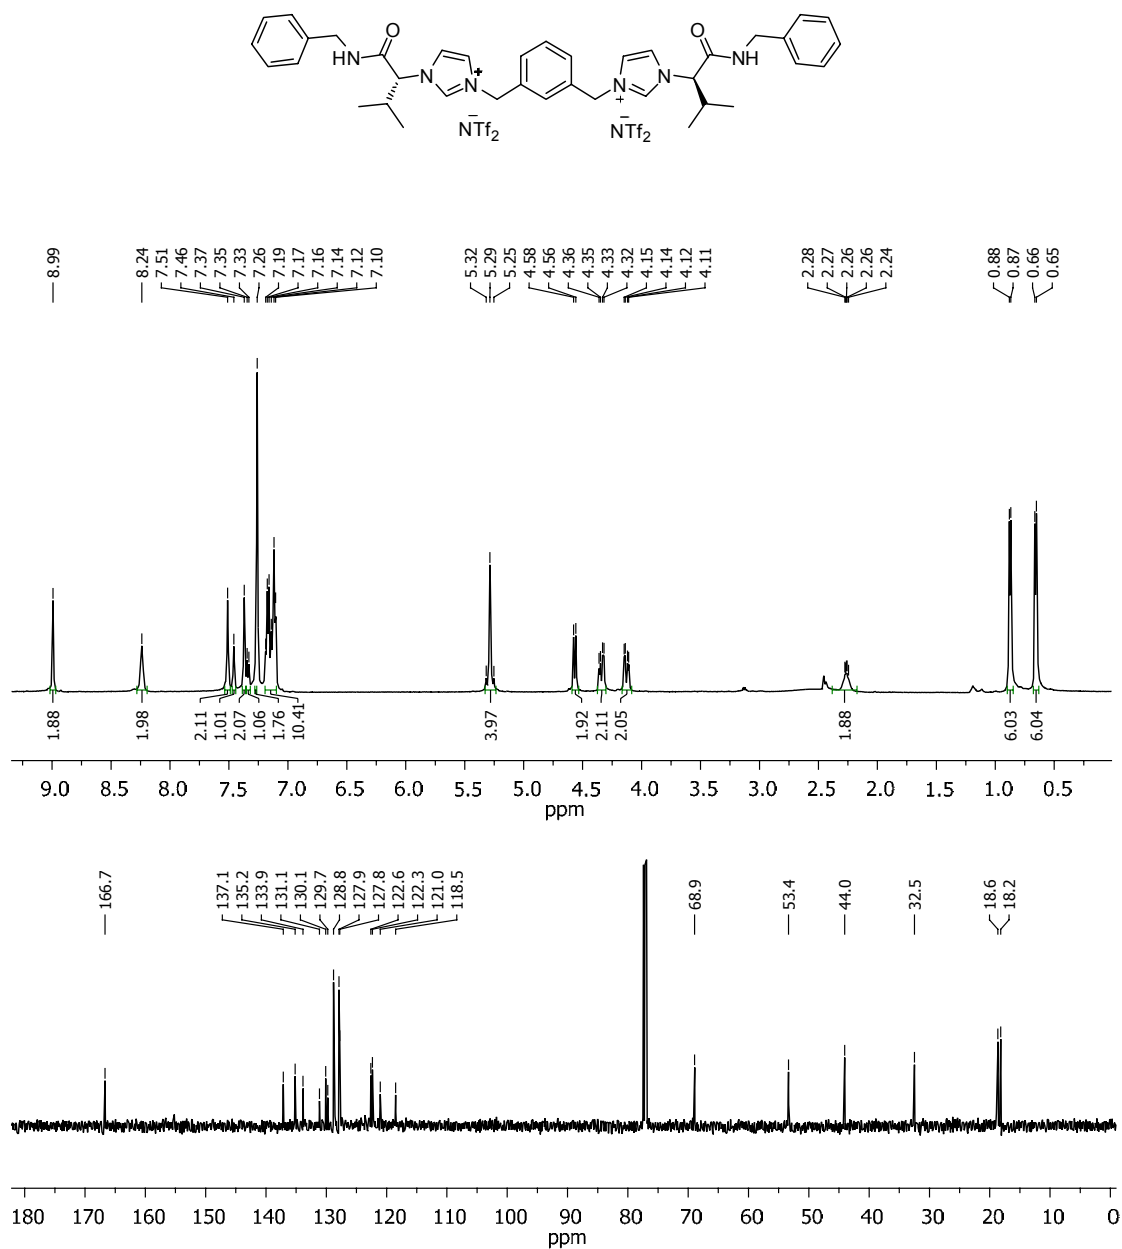

**Figure S5.** <sup>1</sup>H NMR spectra (upper trace) and <sup>13</sup>C NMR spectra (lower trace) for the bis(imidazolium) salt **3b** (10 mM, CDCl<sub>3</sub>, 303 K).

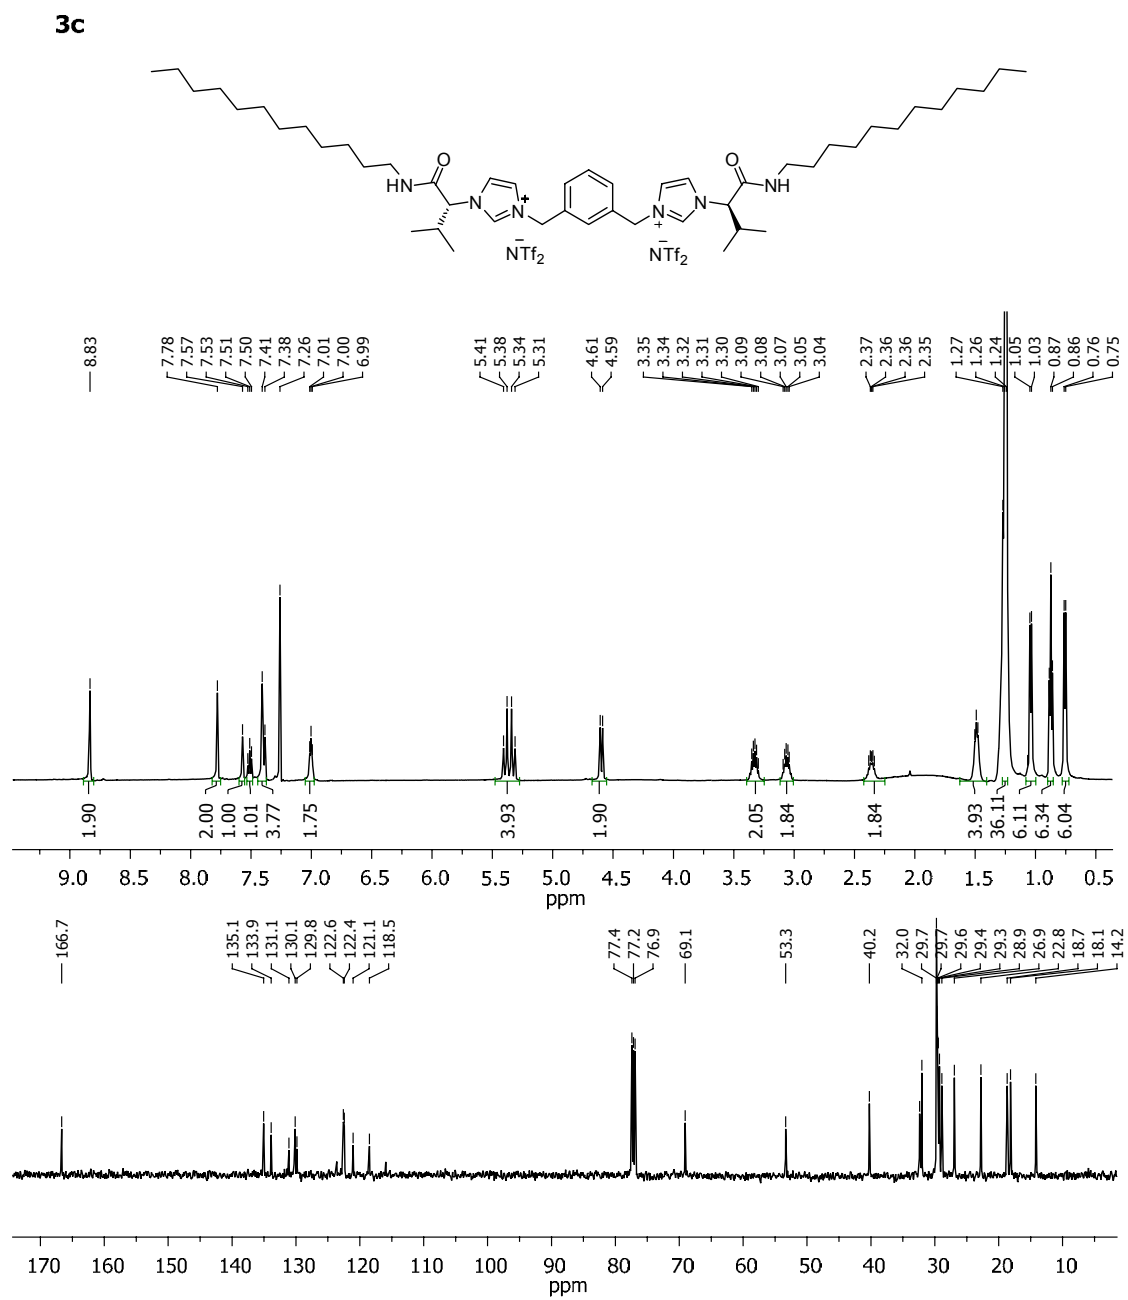

**Figure S6.** <sup>1</sup>H NMR spectra (upper trace) and <sup>13</sup>C NMR spectra (lower trace) for the bis(imidazolium) salt **3c** (10 mM, CDCl<sub>3</sub>, 303 K).

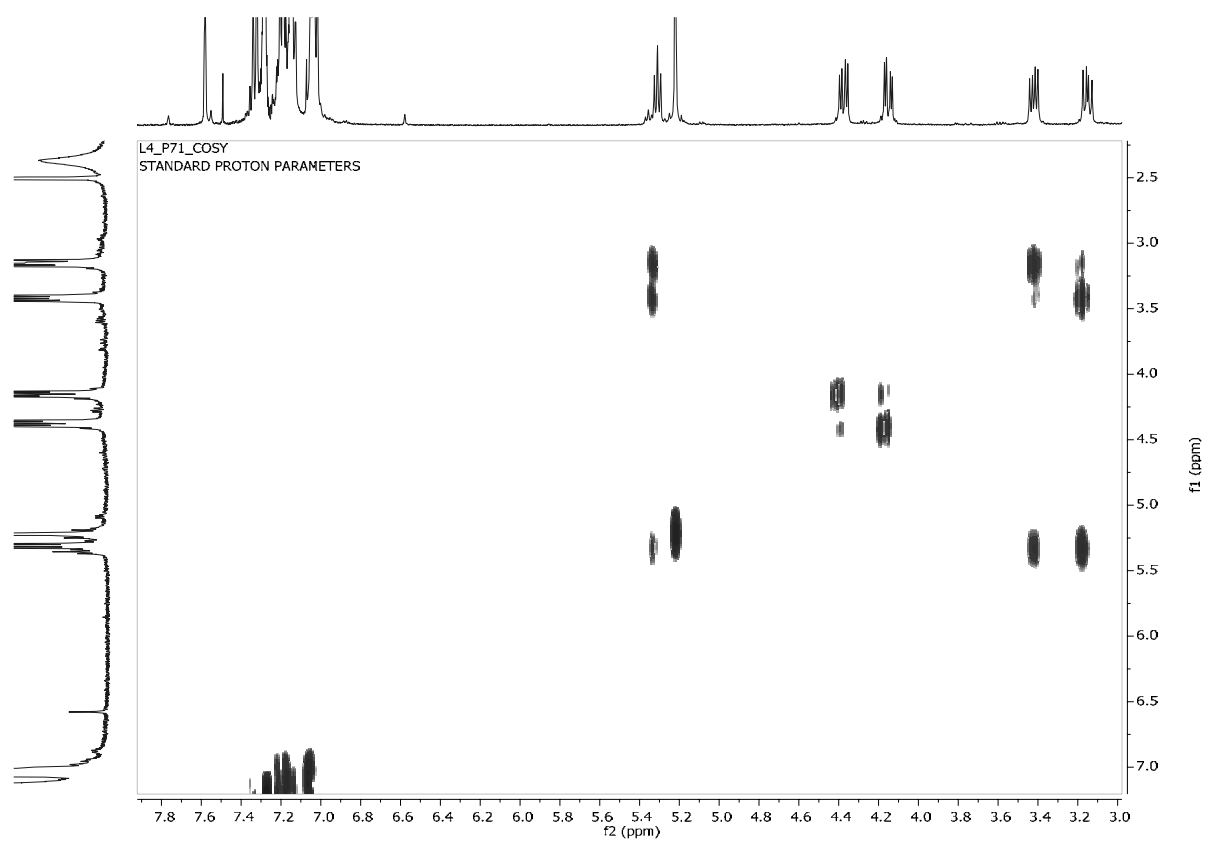

**Figure S7.** gCOSY spectra for the bis(imidazolium) salt **3a**



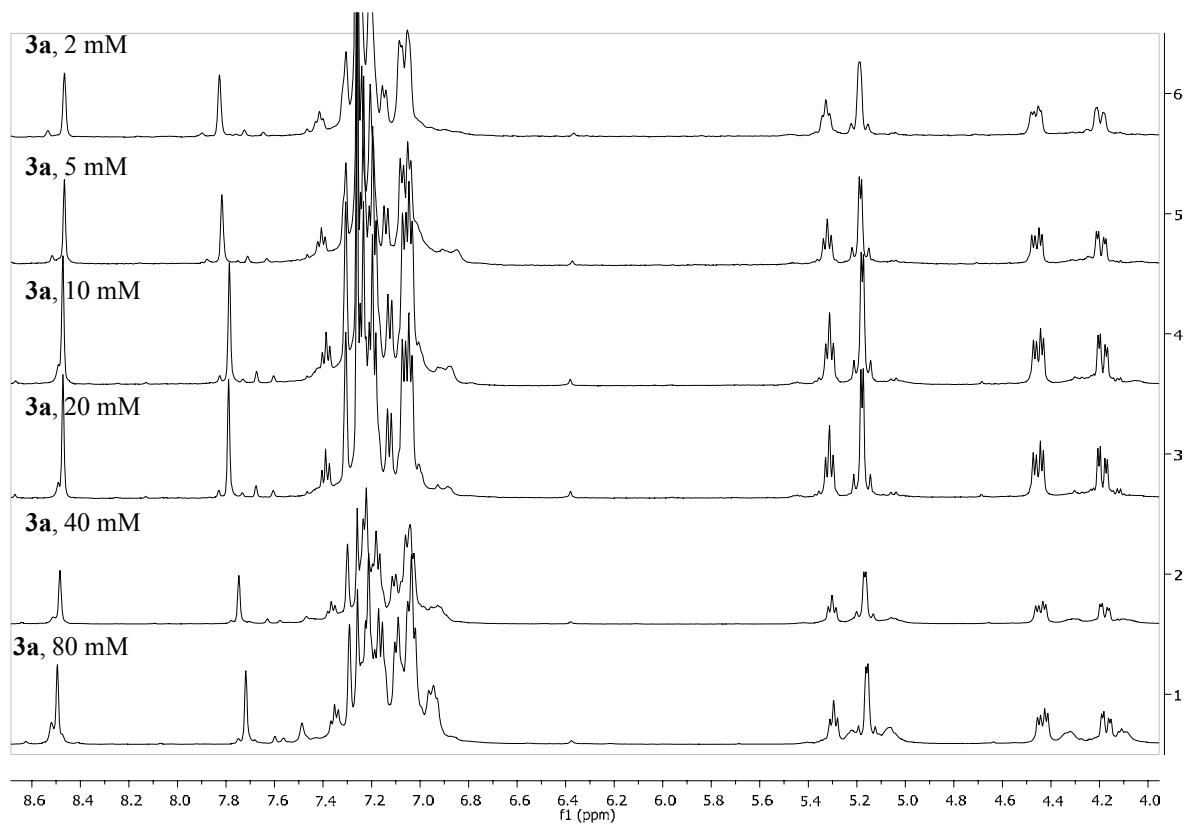

**Figure S8.**  $^1\text{H}$  NMR spectra in  $\text{CDCl}_3$  of **3a** at different concentrations.

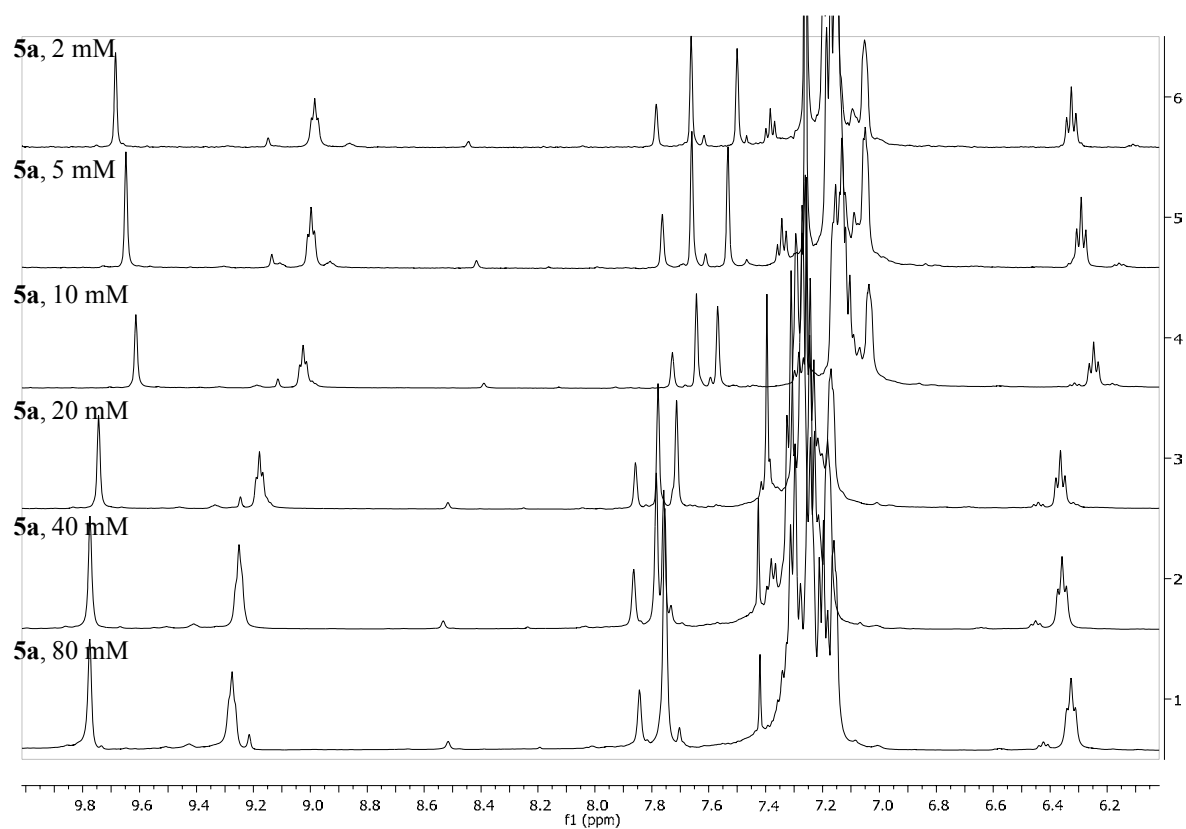

**Figure S9.**  $^1\text{H}$  NMR spectra in  $\text{CDCl}_3$  of **5a** at different concentrations.

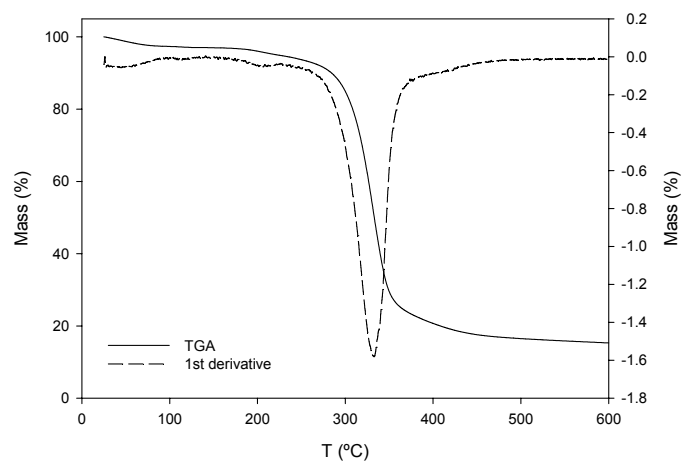

**Figure S10.** TGA and first derivative for the (bis)imidazolium salt **5a**.

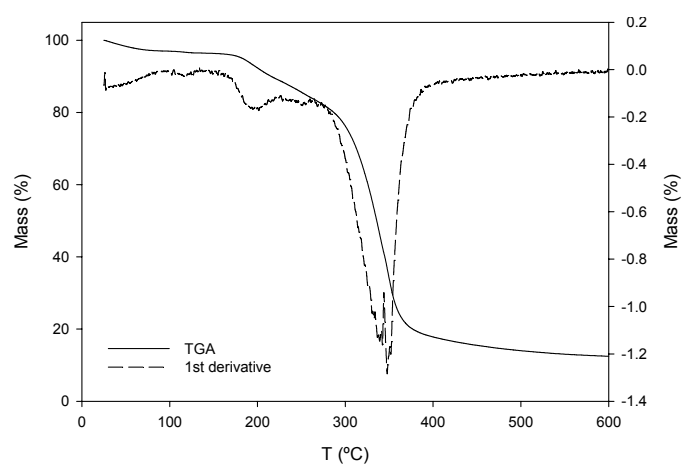

**Figure S11.** TGA and first derivative for the (bis)imidazolium salt **5b**.

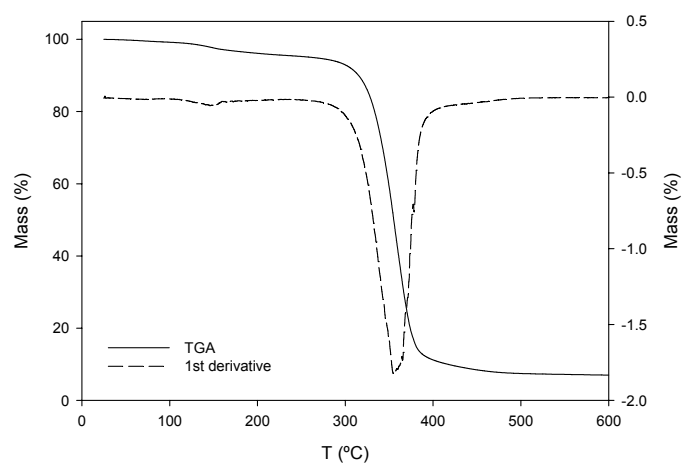

**Figure S12.** TGA and first derivative for the bis(imidazolium) salt **5c**.

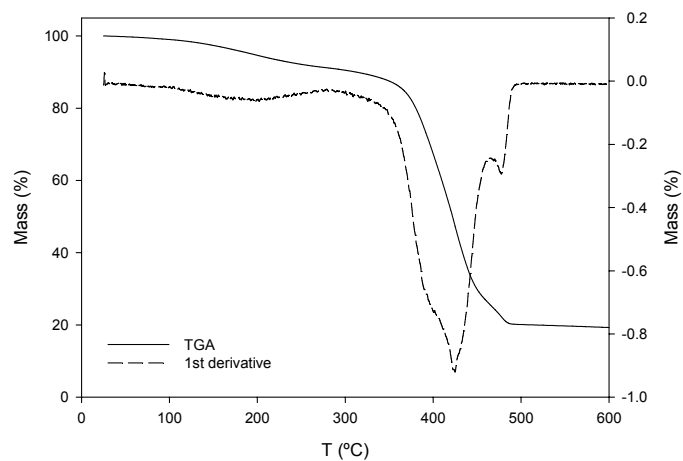

**Figure S13.** TGA and first derivative for the bis(imidazolium) salt **3a**.

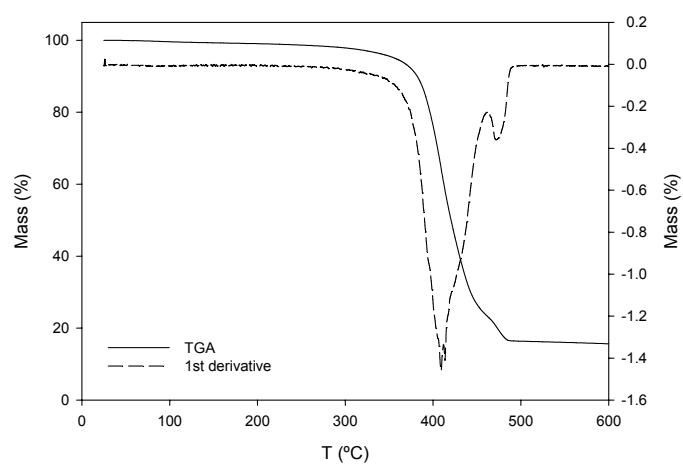

**Figure S14.** TGA and first derivative for the bis(imidazolium) salt **3b**.

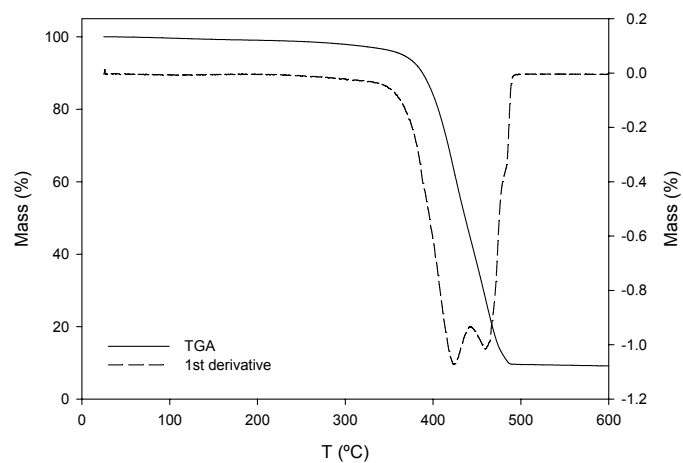

**Figure S15.** TGA and first derivative for the bis(imidazolium) salt **3c**.

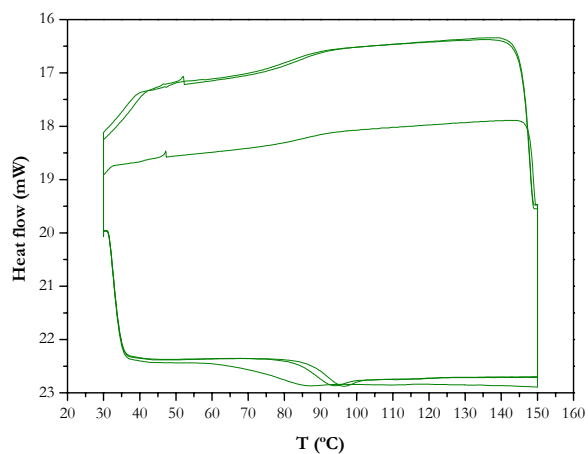

**Figure S16.** DSC for the bis(imidazolium) salt **5a**.

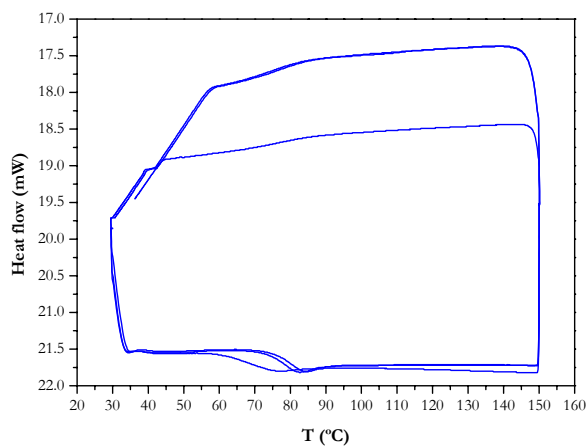

**Figure S17.** DSC for the bis(imidazolium) salt **5b**.

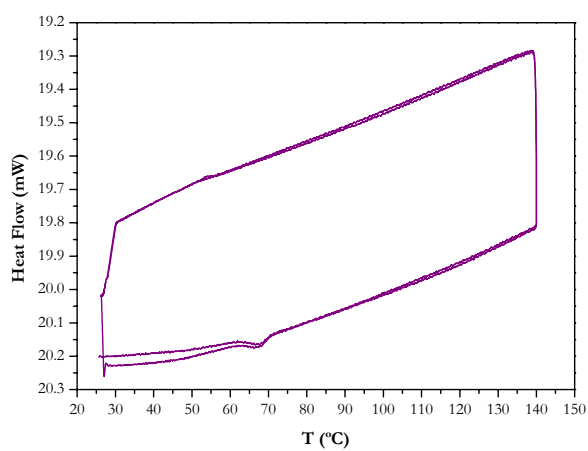

**Figure S18.** DSC for the bis(imidazolium) salt **5c**.

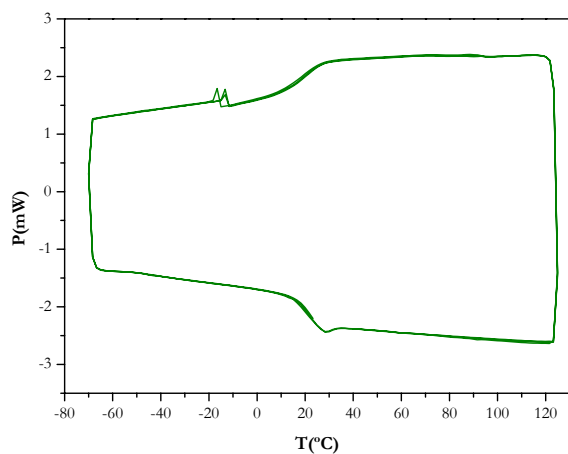

**Figure S19.** DSC for the bis(imidazolium) salt **3a**.

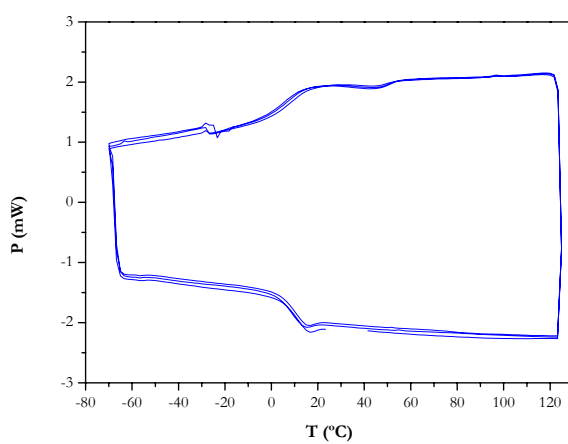

**Figure S20.** DSC for the bis(imidazolium) salt **3b**.

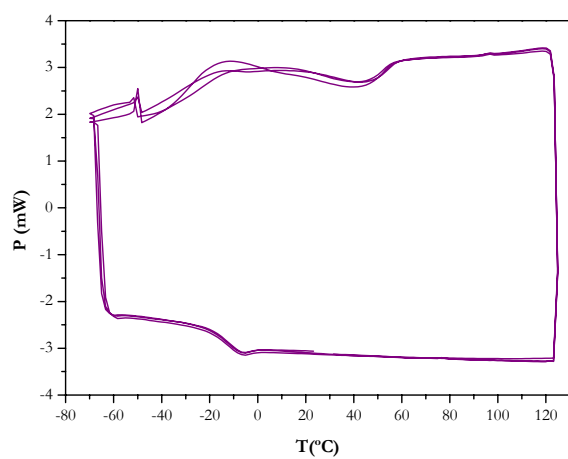

**Figure S21.** DSC for the bis(imidazolium) salt **3c**.

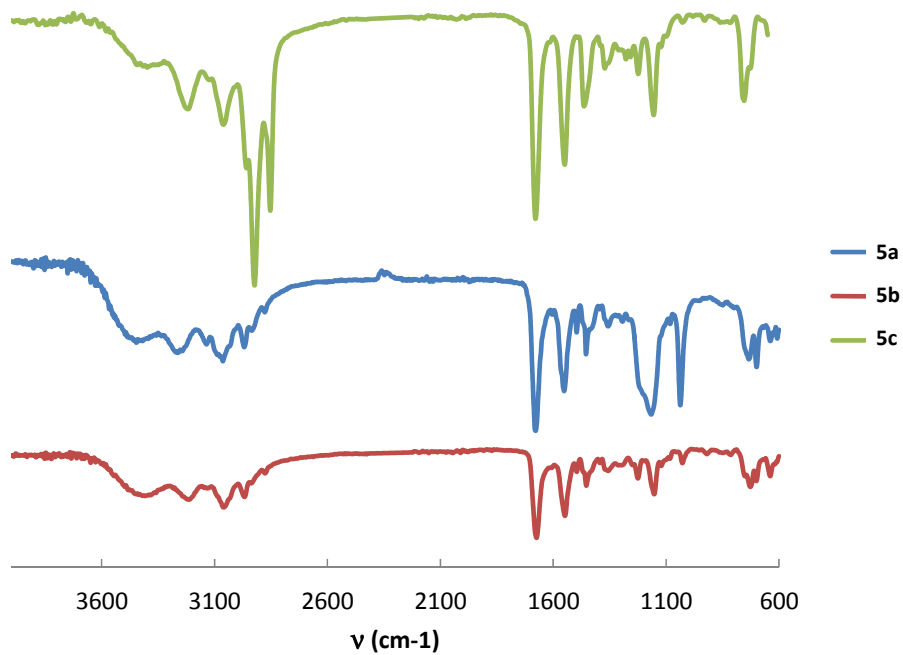

Figure S22. ATR-FTIR spectra for **5a-c** at 25 °C.

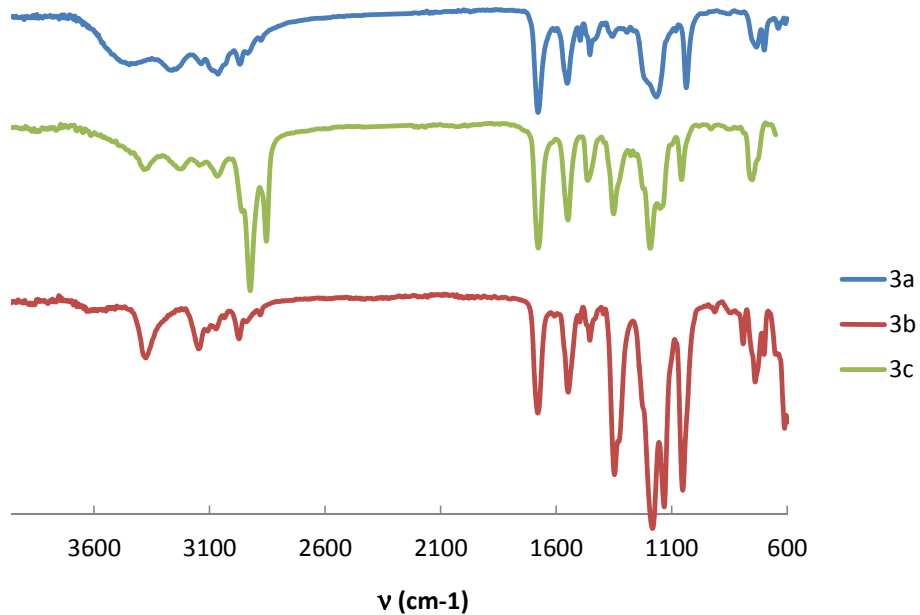

Figure S23. ATR-FTIR spectra for **3a-c** at 25 °C.

**Table S1.** Maximum chemical induced shifts ( $\Delta\delta_{\max}$ , ppm) of selected receptor signals of **3a** in the presence of L- and D-TEA salts (CDCl<sub>3</sub>/DMSO-d<sub>6</sub> 5%, 303 K, 500 MHz).

| Proton signal | $\Delta\delta_{\max}$ L-AspTEA (ppm) | $\Delta\delta_{\max}$ D-AspTEA (ppm) | $\Delta\delta_{\max}$ L-GluTEA (ppm) | $\Delta\delta_{\max}$ D-GluTEA (ppm) |
|---------------|--------------------------------------|--------------------------------------|--------------------------------------|--------------------------------------|
| Ha            | 1.268                                | 1.193                                | 1.100                                | 1.073                                |
| NH            | 2.698                                | 2.681                                | 2.623                                | 2.718                                |
| Hd            | 0.776                                | 0.771                                | 0.926                                | 0.880                                |

**Table S2.** Maximum chemical induced shifts ( $\Delta\delta_{\max}$ , ppm) of selected receptor signals of **3b** in the presence of L- and D-TEA salts (CDCl<sub>3</sub>/DMSO-d<sub>6</sub> 5%, 303 K, 500 MHz).

| Proton signal | $\Delta\delta_{\max}$ L-AspTEA (ppm) | $\Delta\delta_{\max}$ D-AspTEA (ppm) | $\Delta\delta_{\max}$ L-GluTEA (ppm) | $\Delta\delta_{\max}$ D-GluTEA (ppm) |
|---------------|--------------------------------------|--------------------------------------|--------------------------------------|--------------------------------------|
| Ha            | 1.241                                | 1.114                                | 1.365                                | 1.330                                |
| NH            | 2.644                                | 2.604                                | 2.781                                | 2.782                                |
| Hd            | 0.694                                | 0.700                                | 0.858                                | 0.836                                |

**Table S3.** Maximum chemical induced shifts ( $\Delta\delta_{\max}$ , ppm) of selected receptor signals of **3c** in the presence of L- and D-TEA salts (CDCl<sub>3</sub>/DMSO-d<sub>6</sub> 5%, 303 K, 500 MHz).

| Proton signal | $\Delta\delta_{\max}$ L-AspTEA (ppm) | $\Delta\delta_{\max}$ D-AspTEA (ppm) | $\Delta\delta_{\max}$ L-GluTEA (ppm) | $\Delta\delta_{\max}$ D-GluTEA (ppm) |
|---------------|--------------------------------------|--------------------------------------|--------------------------------------|--------------------------------------|
| Ha            | 1.490                                | 1.424                                | 1.388                                | 1.431                                |
| NH            | 2.934                                | 2.798                                | 2.572                                | 2.656                                |
| Hd            | 0.766                                | 0.717                                | 0.885                                | 0.863                                |

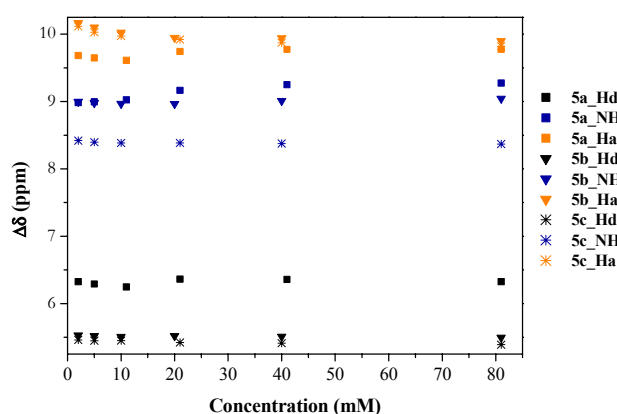

**Figure S24.** Observed chemical shift changes with changing concentration for a Ha, NH and Hd signals in the <sup>1</sup>H NMR spectra of **5a-c** in CDCl<sub>3</sub>.

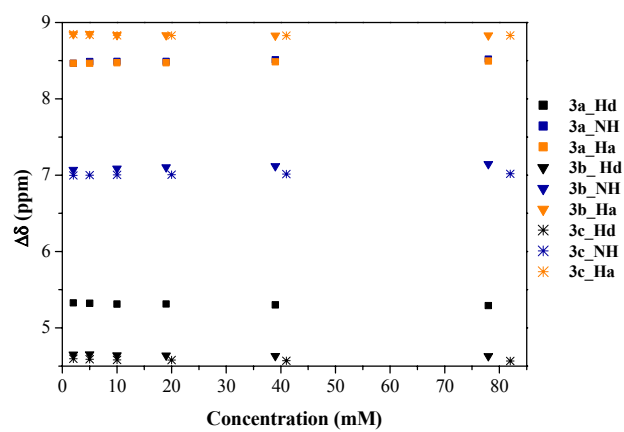

**Figure S25.** Observed chemical shift changes with changing concentration for a Ha, NH and Hd signals in the  $^1\text{H}$  NMR spectra of **3a-c** in  $\text{CDCl}_3$ .



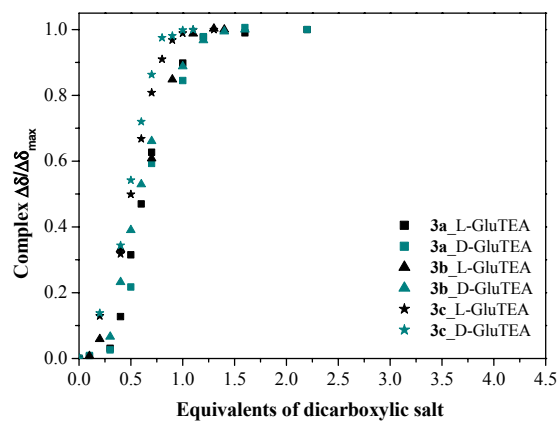

**Figure S26.** Complexation curve for the receptors **3a-c** (8mM) in the presence of L- or D- GluTEA (variation of Hd proton signal).

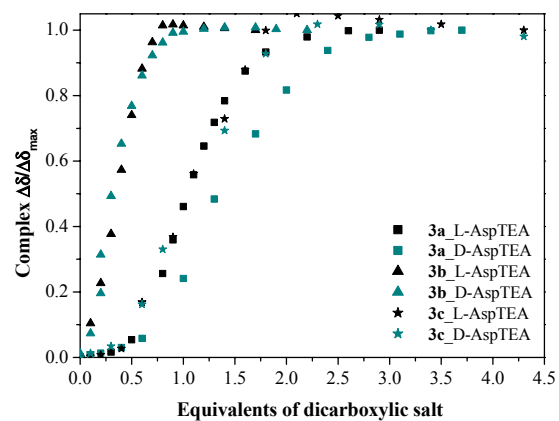

**Figure S27.** Complexation curve for the receptors **3a-c** (8mM) in the presence of L- or D- AspTEA (variation of Ha proton signal).

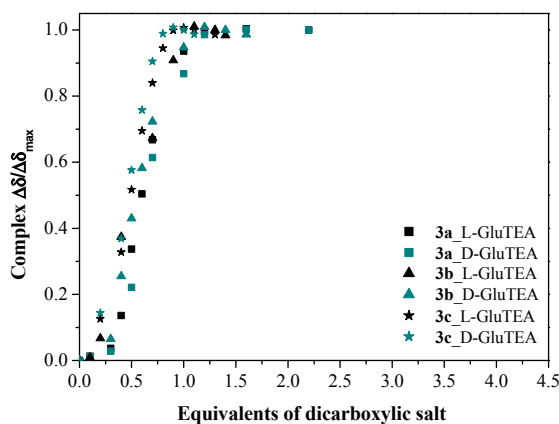

**Figure S28.** Complexation curve for the receptors **3a-c** (8mM) in the presence of L- or D- GluTEA (variation of Ha proton signal).

### Fitting of the titration data

We were unable to perform an acceptable fitting to the 1:1 binding mode (receptor:guest), and we could only get a rough estimation of the binding interaction by manual fitting, and considering a complex model of equilibria, using the variation of the chemical shifts of the Ha, Hd and NH proton signals

For the complexes **3a**, **3b** and **3c** with Asp:

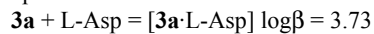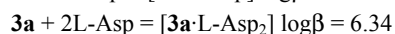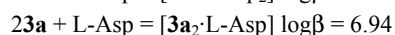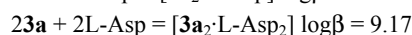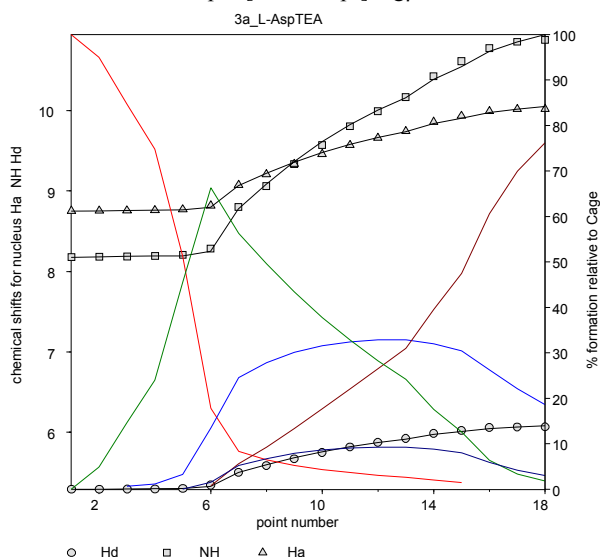

**Figure S29.** Plot of the experimental and calculated chemical shifts (manual fit) of the **3a**/L-Asp titration experiments, including a more complex binding mode. The obtained binding constants for the corresponding equilibria are shown.

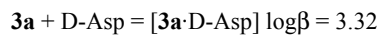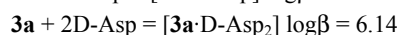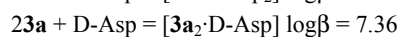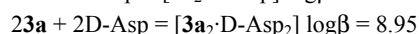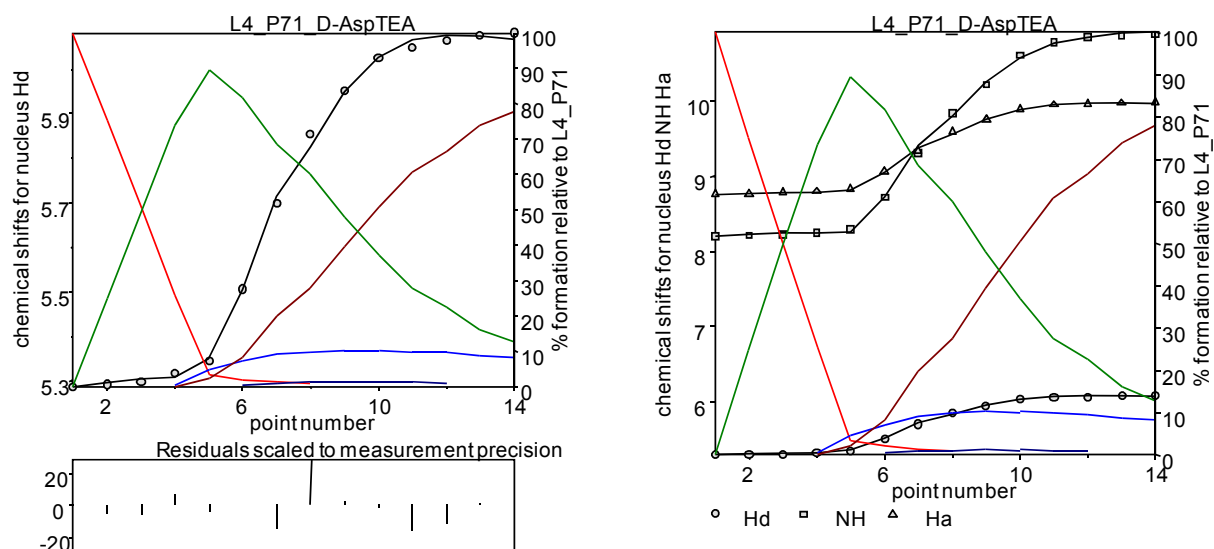

**Figure S30.** Plot of the experimental and calculated chemical shifts (manual fit) of the **3a**/D-Asp titration experiments, including a more complex binding mode. The obtained binding constants for the corresponding equilibria are shown.

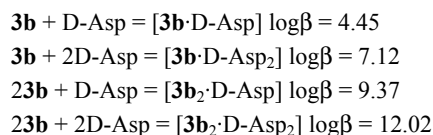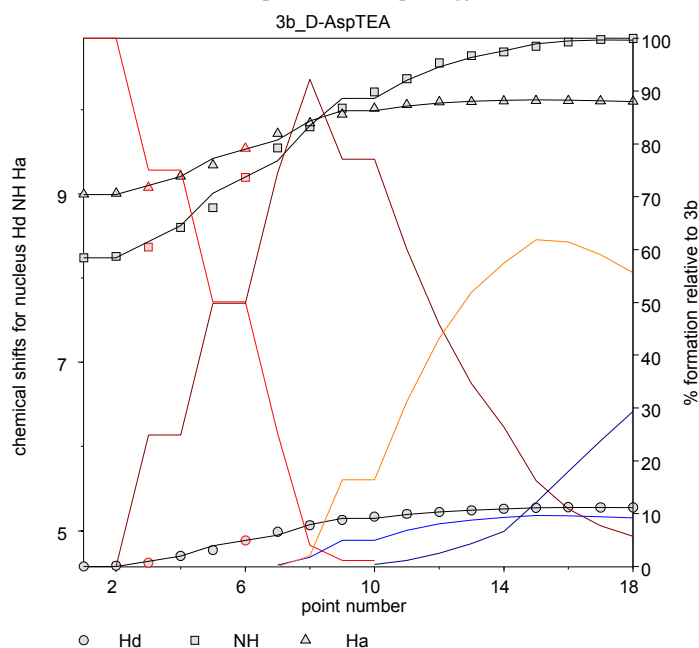

**Figure S31.** Plot of the experimental and calculated chemical shifts (manual fit) of the **3b**/D-Asp titration experiments, including a more complex binding mode. The obtained binding constants for the corresponding equilibria are shown

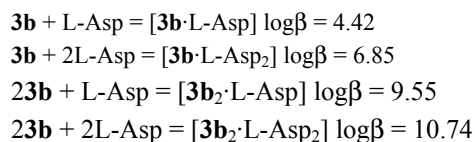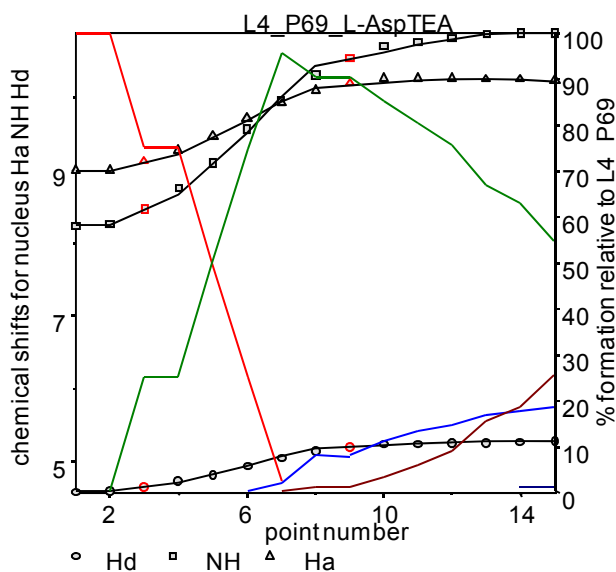

**Figure S32.** Plot of the experimental and calculated chemical shifts (manual fit) of the **3b**/L-Asp titration experiments, including a more complex binding mode. The obtained binding constants for the corresponding equilibria are shown

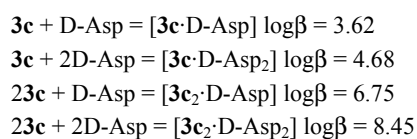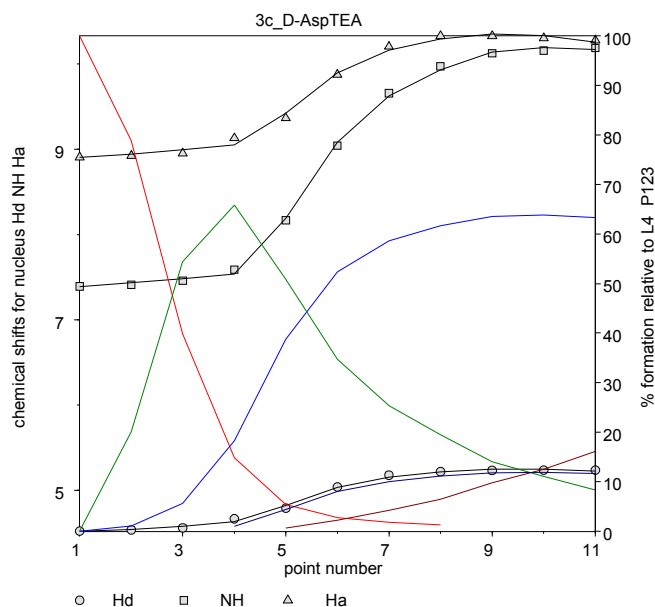

**Figure S33.** Plot of the experimental and calculated chemical shifts (manual fit) of the **3c**/D-Asp titration experiments, including a more complex binding mode. The obtained binding constants for the corresponding equilibria are shown

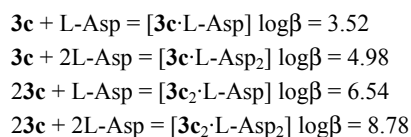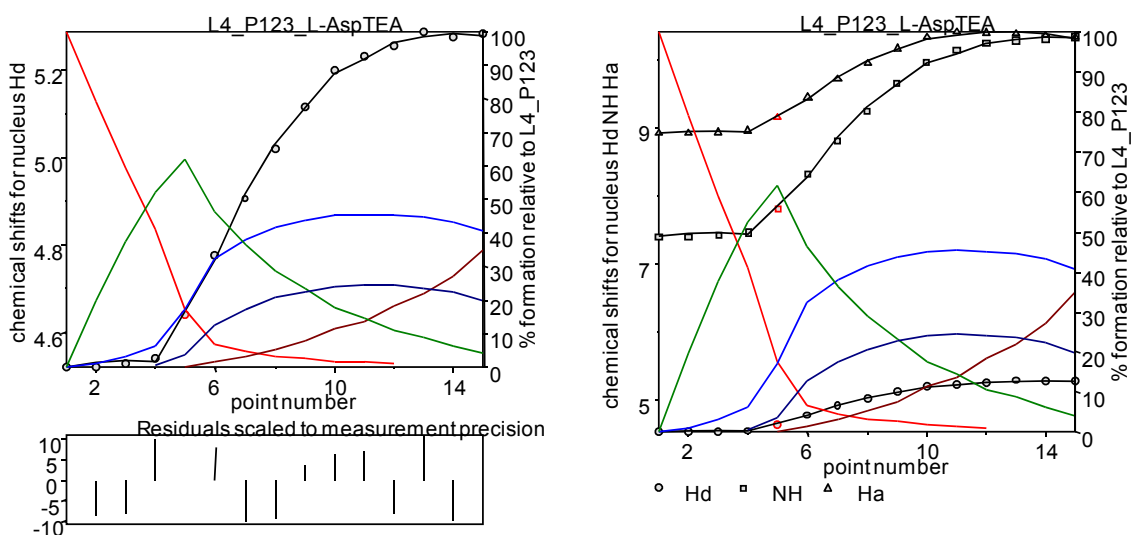

**Figure S34.** Plot of the experimental and calculated chemical shifts (manual fit) of the **3c**/L-Asp titration experiments, including a more complex binding mode. The obtained binding constants for the corresponding equilibria are shown

For the complexes **3a**, **3b** and **3c** with Glu

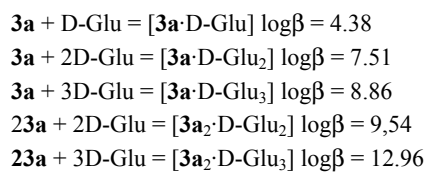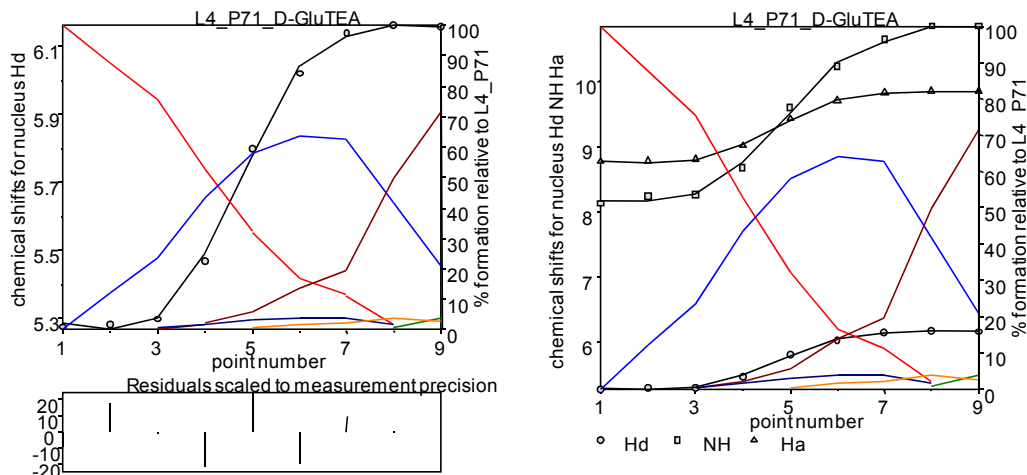

**Figure S35.** Plot of the experimental and calculated chemical shifts (manual fit) of the **3a**/L-Glu titration experiments, including a more complex binding mode. The obtained binding constants for the corresponding equilibria are shown.

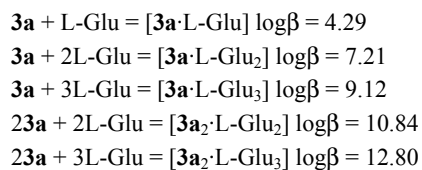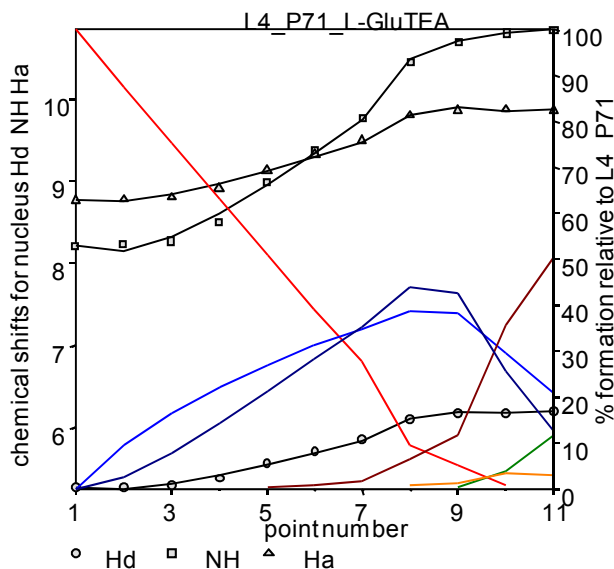

**Figure S36.** Plot of the experimental and calculated chemical shifts (manual fit) of the **3a**/D-Glu titration experiments, including a more complex binding mode. The obtained binding constants for the corresponding equilibria are shown

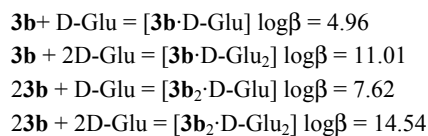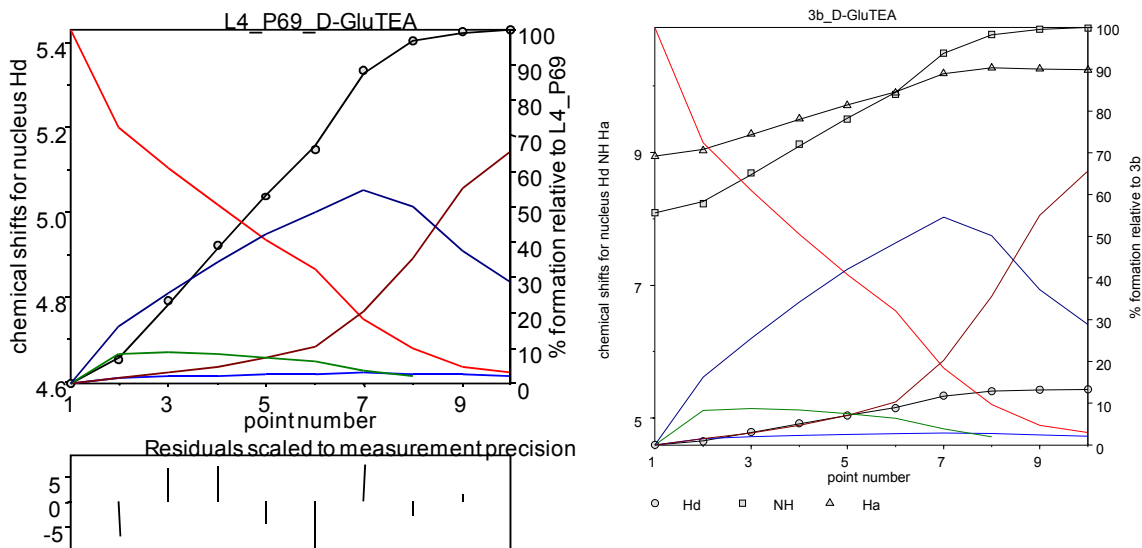

**Figure S37.** Plot of the experimental and calculated chemical shifts (manual fit) of the **3b**/D-Glu titration experiments, including a more complex binding mode. The obtained binding constants for the corresponding equilibria are shown

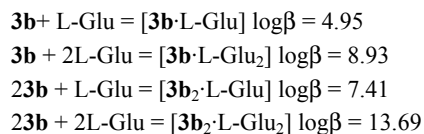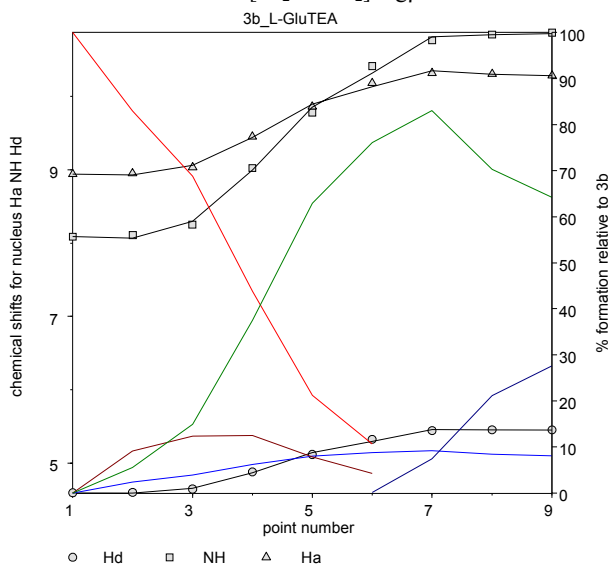

**Figure S38.** Plot of the experimental and calculated chemical shifts (manual fit) of the **3b**/L-Glu titration experiments, including a more complex binding mode. The obtained binding constants for the corresponding equilibria are shown

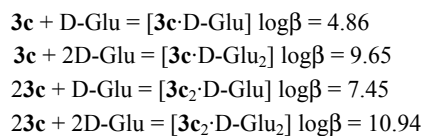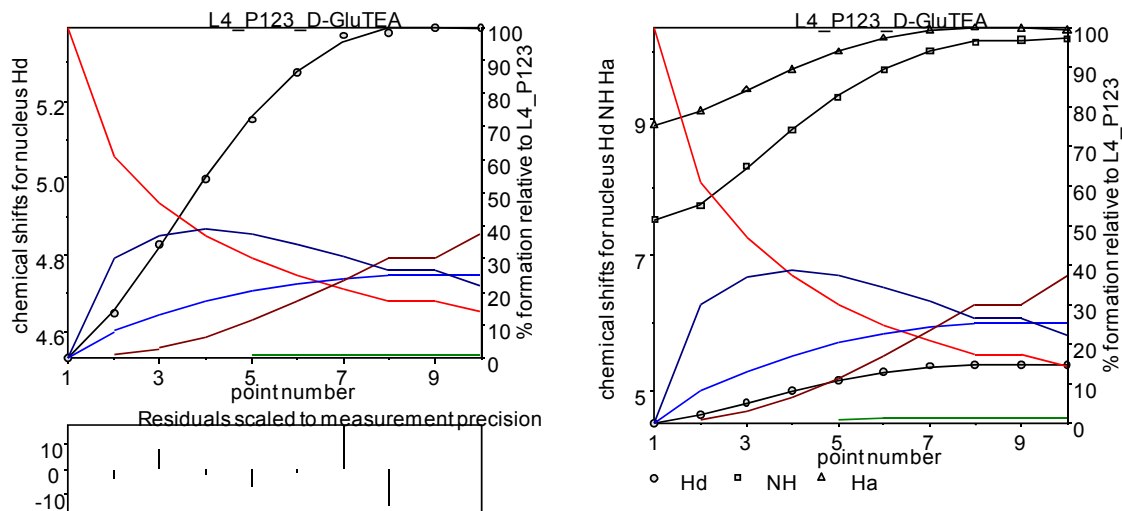

**Figure S39.** Plot of the experimental and calculated chemical shifts (manual fit) of the **3c**/L-Glu titration experiments, including a more complex binding mode. The obtained binding constants for the corresponding equilibria are shown

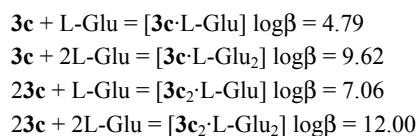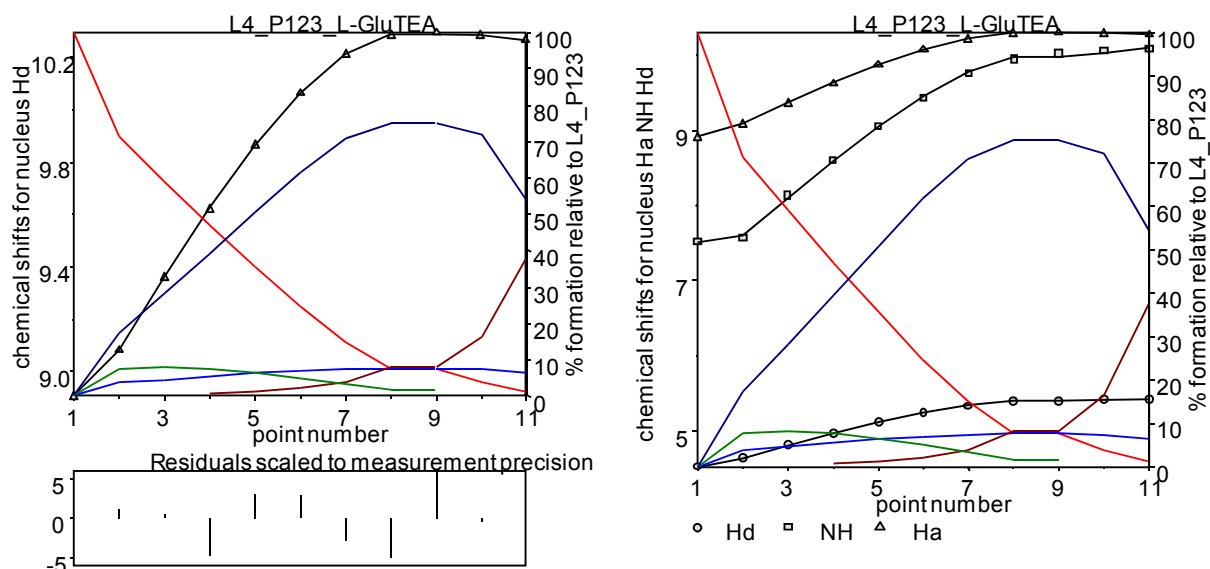

**Figure S40.** Plot of the experimental and calculated chemical shifts (manual fit) of the **3c**/D-Glu titration experiments, including a more complex binding mode. The obtained binding constants for the corresponding equilibria are shown

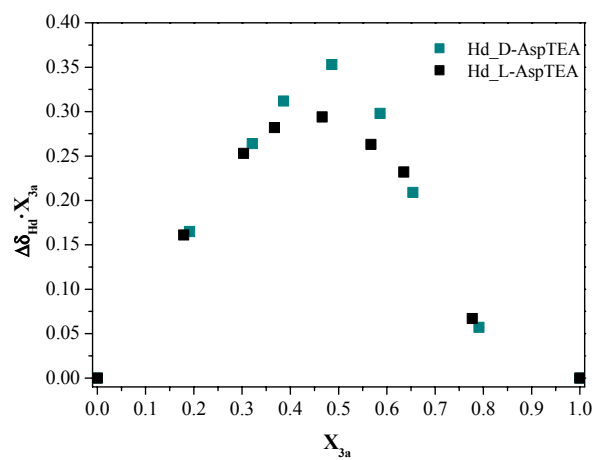

**Figure S41.** Job plots of **3a** with L-aspartate and with D-aspartate. The  $\Delta\delta$  stands for the chemical shift change of the Hd (chiral proton) proton of **3a** in the presence of guest. Total concentration is 8 mM,  $CDCl_3/DMSO-d_6$  (5%).



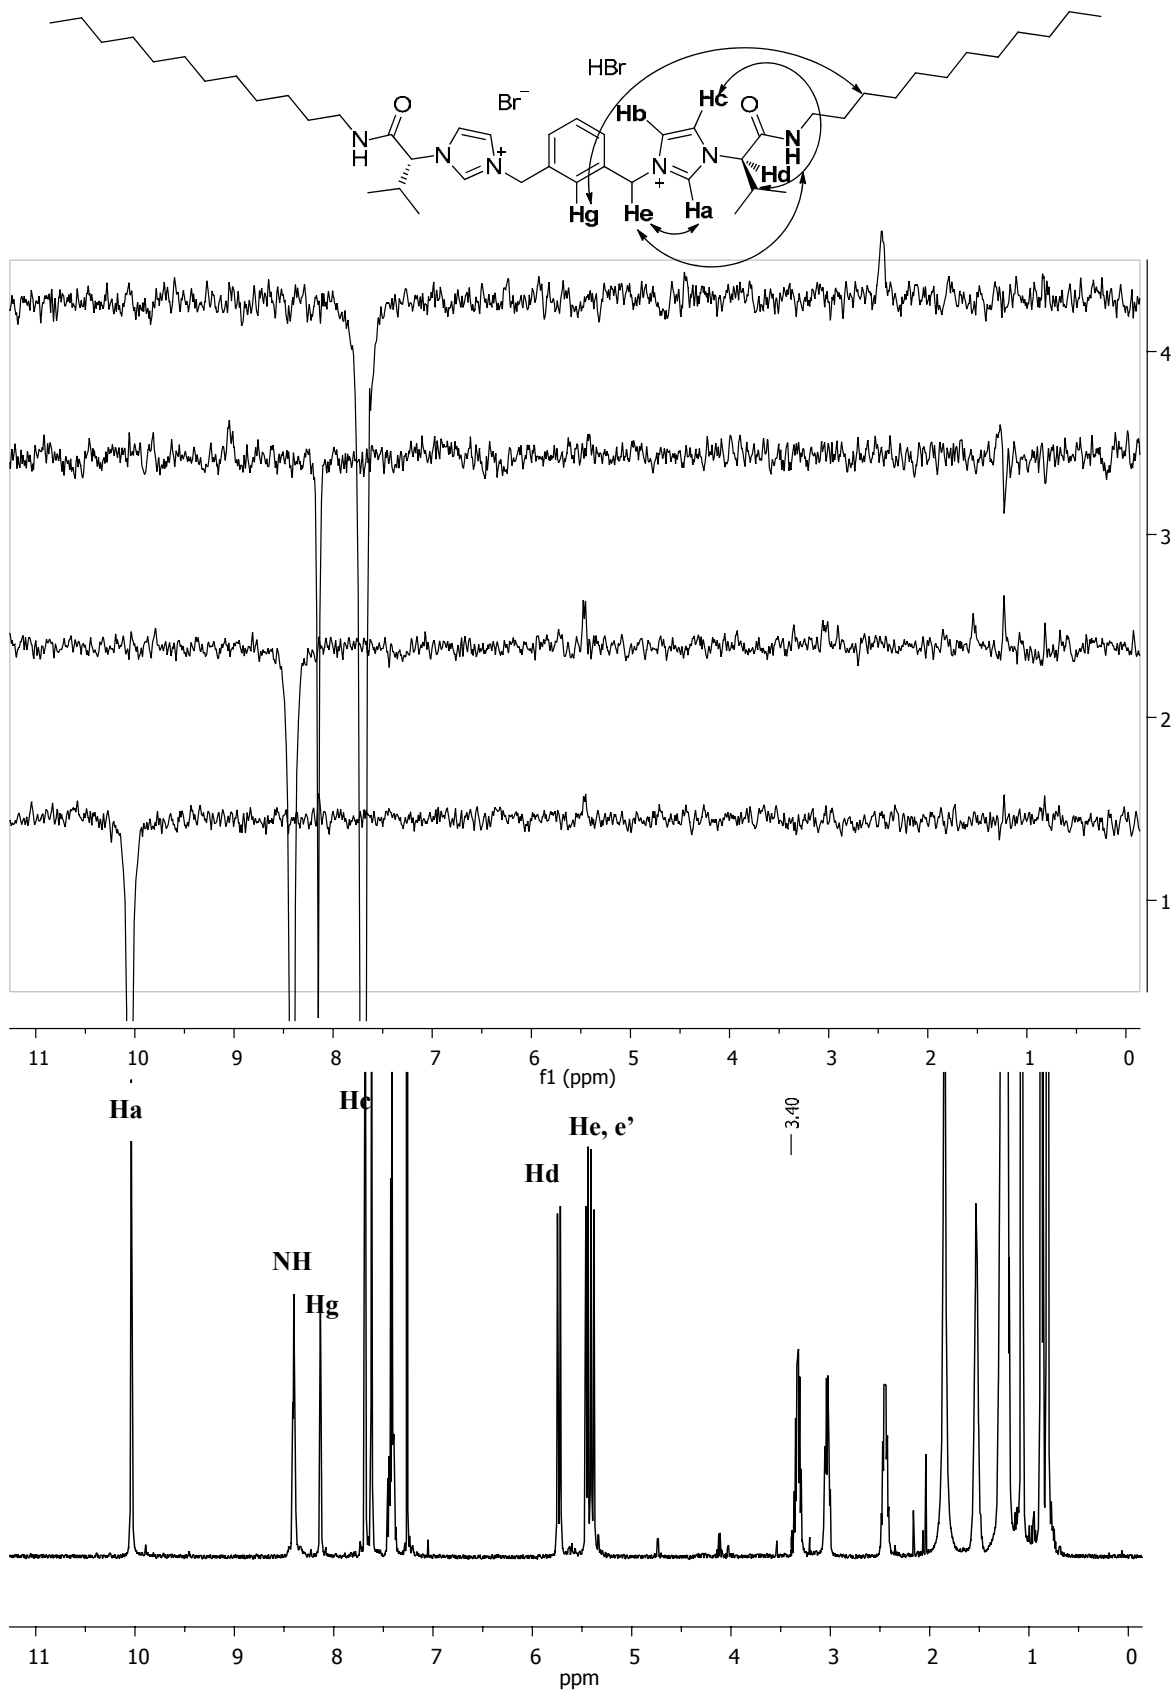

**Figure S42.** NOESY and  $^1\text{H}$  NMR spectra of **5c** (500 MHz, at 303 K in  $\text{CDCl}_3$ ). NOE peaks have been assigned with double-headed arrows (NOESY spectrum 500 MHz, at 303 K in  $\text{CDCl}_3$ ).

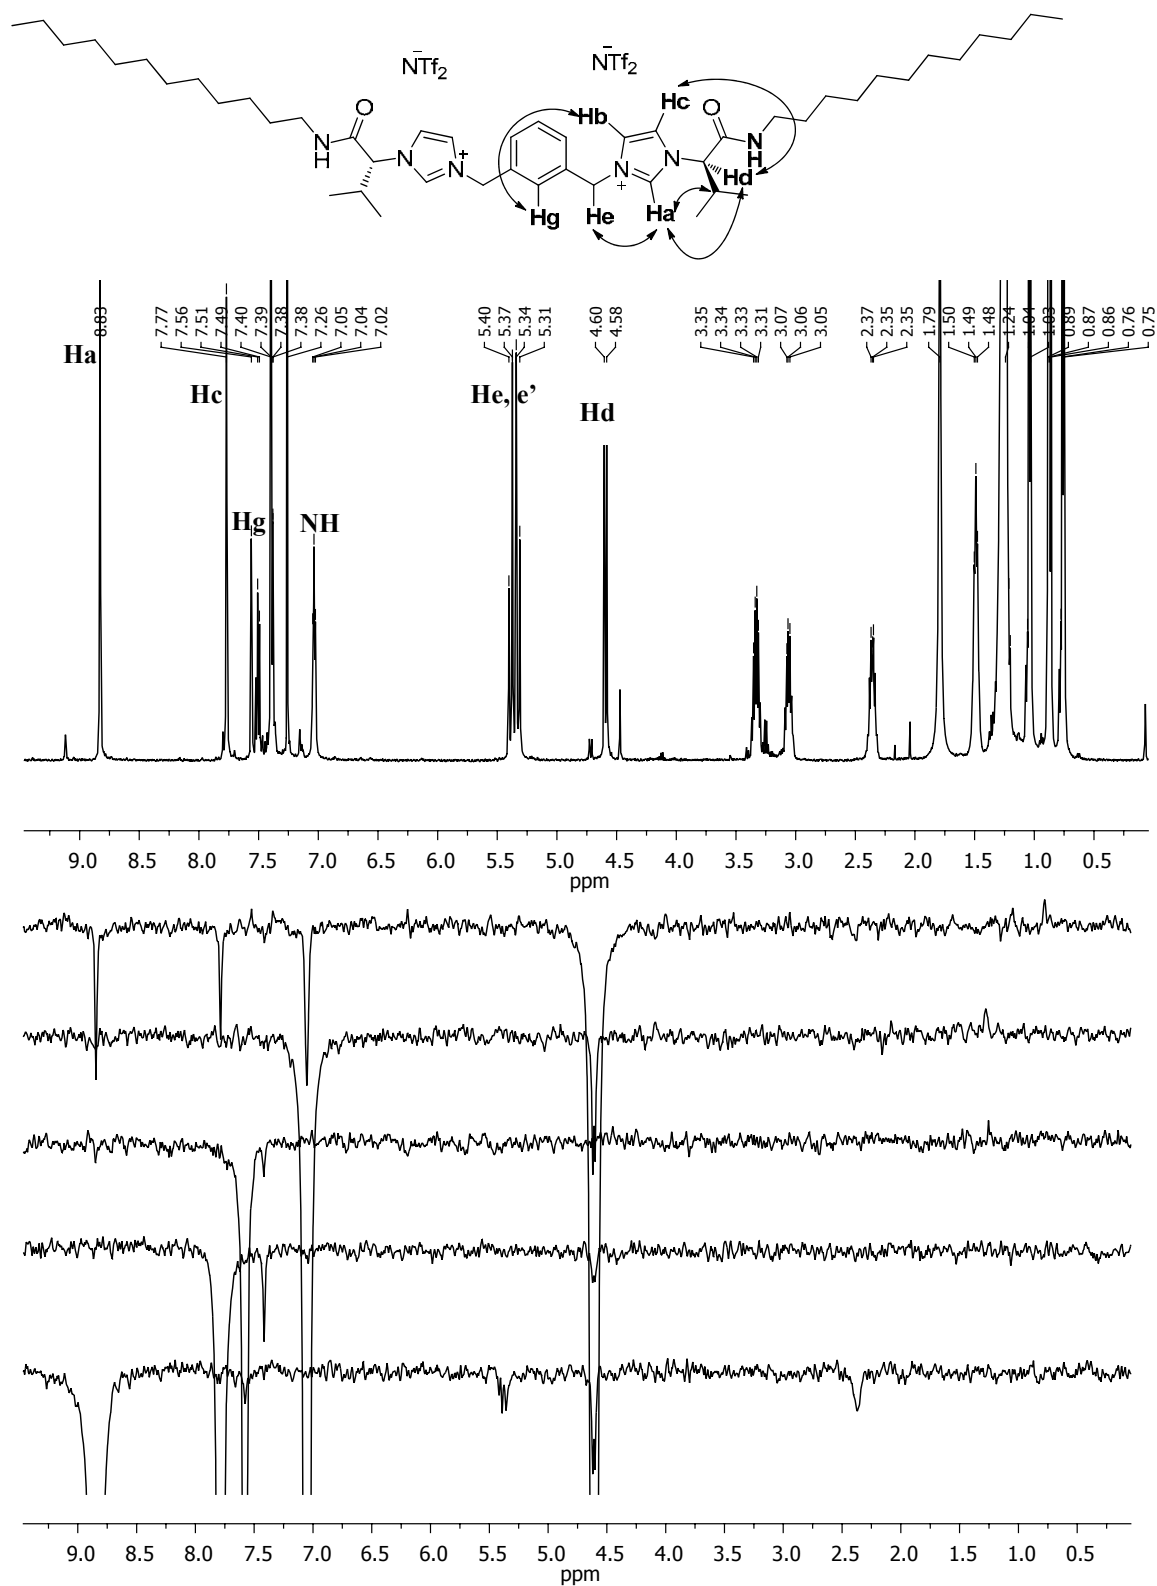

**Figure S43.** NOESY and  $^1\text{H}$  NMR spectra of **3c** (500 MHz, at 303 K in  $\text{CDCl}_3$ ). NOE peaks have been assigned with double-headed arrows (NOESY spectrum 500 MHz, at 303 K in  $\text{CDCl}_3$ ).

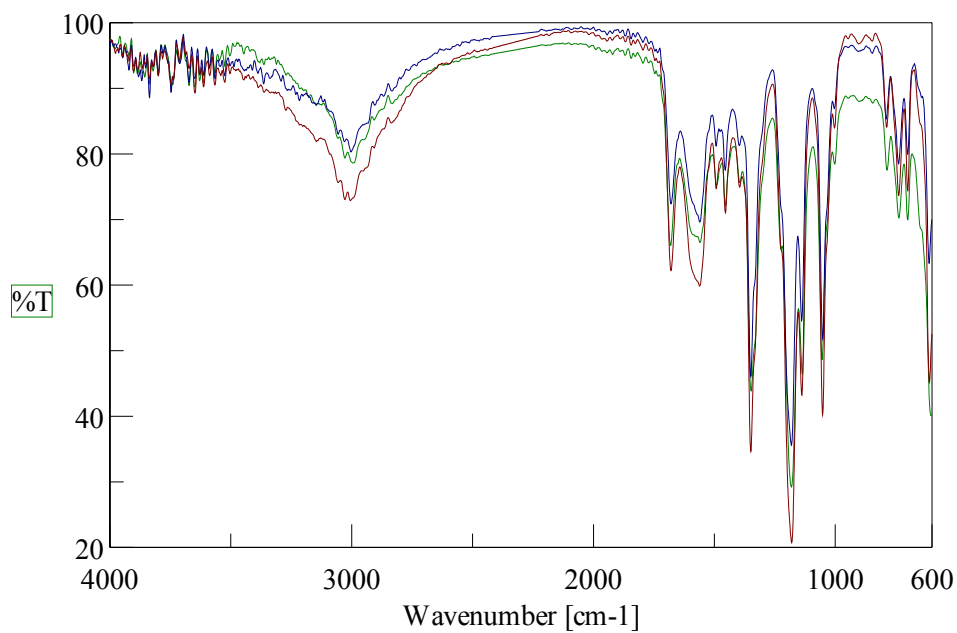

**Figure S44.** ATR-FTIR spectra of the 1:1 mixture **3a**:L-AspTEA at 25 °C (blue line); **3a**:L-AspTEA at 55 °C (red line) and **3a**:L-AspTEA at 94 °C (green line).

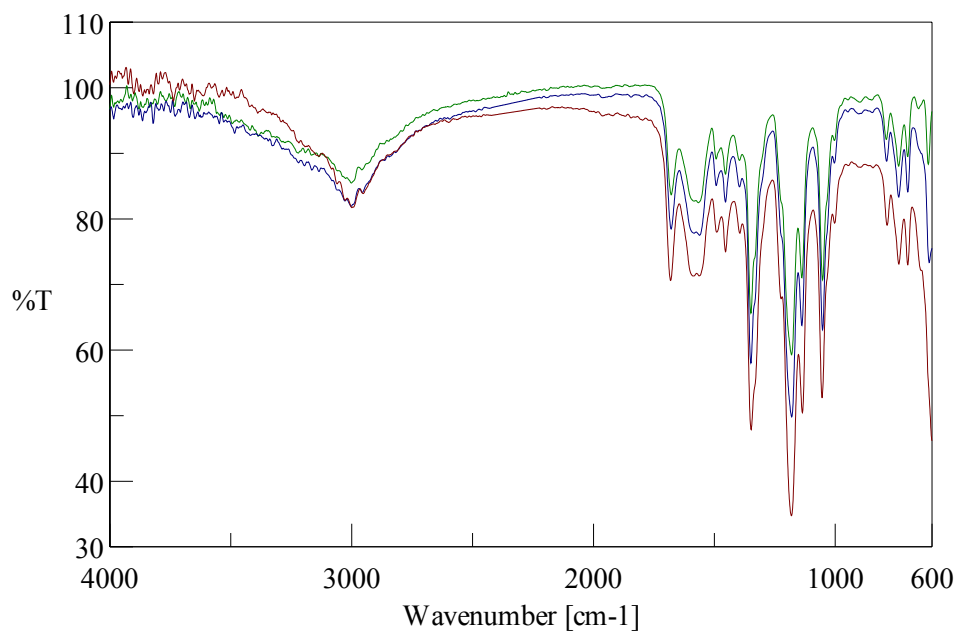

**Figure S45.** ATR-FTIR spectra of the 1:1 mixture **3a**:D-AspTEA at 30 °C (green line); **3a**:D-AspTEA at 55 °C (blue line) and **3a**:D-AspTEA at 94 °C (red line).

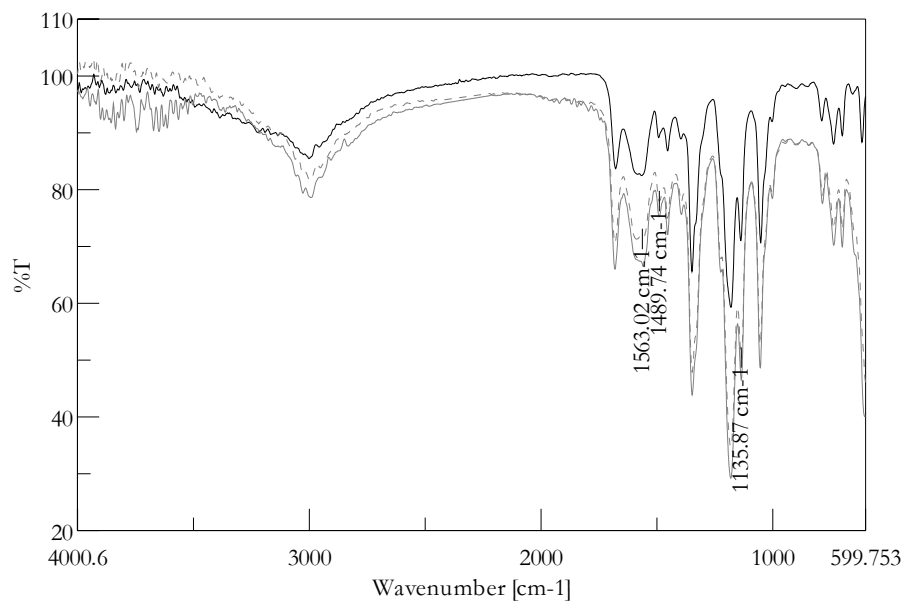

**Figure S46.** ATR-FTIR spectra of the 1:1 mixture **3a**:D-AspTEA at 25 °C (black line); **3a**:D-AspTEA at 94 °C (dotted grey line) and **3a**:L-AspTEA at 94 °C (grey line).

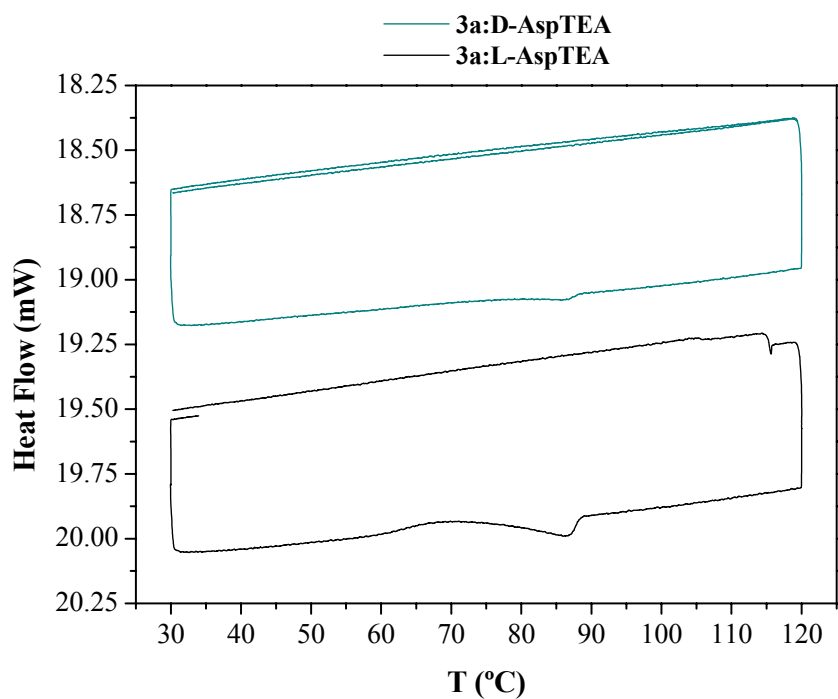

**Figure S47.** DSC of **3a**:D-aspTEA complex and **3a**:L-AspTEA complex.

## Theoretical calculations

### Optimized structure for 5a

|    |              |              |              |   |              |              |              |
|----|--------------|--------------|--------------|---|--------------|--------------|--------------|
| C  | -1.398158000 | -2.954080000 | 1.914275000  | C | 5.234494000  | 0.526332000  | 0.612423000  |
| H  | -2.195135000 | -3.570525000 | 2.342607000  | H | 5.684698000  | 0.873477000  | 1.550992000  |
| H  | -0.666161000 | -2.704213000 | 2.692429000  | H | 5.378784000  | 1.328988000  | -0.117165000 |
| C  | 1.365712000  | -2.668410000 | -2.244764000 | C | -5.248014000 | 0.489673000  | -0.515154000 |
| H  | 0.581115000  | -2.303075000 | -2.922278000 | H | -5.725465000 | 0.947064000  | -1.390894000 |
| H  | 2.126695000  | -3.214160000 | -2.811917000 | H | -5.419717000 | 1.167322000  | 0.326615000  |
| N  | 1.991803000  | -1.453591000 | -1.672848000 | H | -3.508710000 | -0.190565000 | -1.668410000 |
| N  | 3.006255000  | -0.085877000 | -0.319662000 | C | -0.768698000 | 3.620405000  | -2.838981000 |
| N  | -1.972072000 | -1.662102000 | 1.491696000  | C | 1.968168000  | 4.252949000  | -2.858034000 |
| N  | -2.980929000 | -0.137471000 | 0.313495000  | C | -0.039495000 | 3.660217000  | -1.643300000 |
| C  | 2.048783000  | -0.221633000 | -2.303160000 | C | -0.106737000 | 3.886728000  | -4.042161000 |
| H  | 1.564832000  | -0.057595000 | -3.252964000 | C | 1.253840000  | 4.203519000  | -4.055168000 |
| C  | 2.690272000  | 0.636145000  | -1.459796000 | C | 1.319496000  | 3.976484000  | -1.649610000 |
| H  | 2.900708000  | 1.689615000  | -1.538477000 | H | -0.542250000 | 3.444358000  | -0.704264000 |
| C  | 2.574513000  | -1.342559000 | -0.471639000 | H | -0.661484000 | 3.845692000  | -4.977148000 |
| H  | 2.618852000  | -2.098477000 | 0.297502000  | H | 1.751788000  | 4.411085000  | -4.999002000 |
| C  | -2.684700000 | -1.438505000 | 0.379215000  | H | 1.880874000  | 3.991293000  | -0.719397000 |
| H  | -2.927189000 | -2.163952000 | -0.379804000 | H | 3.025366000  | 4.506873000  | -2.860841000 |
| C  | -1.797026000 | -0.456290000 | 2.150961000  | C | 0.586882000  | 3.121169000  | 3.244724000  |
| H  | -1.165283000 | -0.387348000 | 3.023191000  | C | -2.172111000 | 3.663135000  | 3.211366000  |
| C  | -2.441481000 | 0.498393000  | 1.421774000  | C | 0.030477000  | 3.930995000  | 2.246509000  |
| H  | -2.537806000 | 1.562242000  | 1.562928000  | C | -0.257151000 | 2.584088000  | 4.224783000  |
| C  | 0.733527000  | -3.534537000 | -1.182723000 | C | -1.627517000 | 2.853513000  | 4.210977000  |
| C  | -0.581567000 | -5.061269000 | 0.760027000  | C | -1.339596000 | 4.198354000  | 2.224866000  |
| C  | 0.849529000  | -4.926375000 | -1.192283000 | H | 0.678116000  | 4.364073000  | 1.488327000  |
| C  | -0.036517000 | -2.921282000 | -0.194792000 | H | 0.162855000  | 1.956114000  | 5.007608000  |
| C  | -0.684389000 | -3.666263000 | 0.786495000  | H | -2.266881000 | 2.438076000  | 4.986019000  |
| C  | 0.183321000  | -5.684856000 | -0.226574000 | H | -1.760283000 | 4.817621000  | 1.438131000  |
| H  | 1.447560000  | -5.419426000 | -1.954818000 | H | -3.237342000 | 3.877428000  | 3.197098000  |
| H  | -0.122845000 | -1.842385000 | -0.194959000 | C | -5.839492000 | -0.878067000 | -0.251642000 |
| H  | 0.266678000  | -6.767850000 | -0.239975000 | C | -6.895754000 | -3.440013000 | 0.239113000  |
| H  | -1.082805000 | -5.659827000 | 1.516969000  | C | -5.989103000 | -1.803527000 | -1.295744000 |
| Br | -1.460668000 | -0.857945000 | -3.015378000 | C | -6.227041000 | -1.257724000 | 1.039727000  |
| Br | 1.523590000  | -1.366487000 | 2.966865000  | C | -6.752833000 | -2.528317000 | 1.285425000  |
| C  | 3.720433000  | 0.378393000  | 0.885572000  | C | -6.512197000 | -3.073636000 | -1.053672000 |
| H  | 3.532696000  | -0.393208000 | 1.635779000  | H | -5.692970000 | -1.526524000 | -2.305122000 |
| C  | -3.731694000 | 0.455569000  | -0.813277000 | H | -6.119833000 | -0.549032000 | 1.858024000  |
| C  | -3.236628000 | 1.889612000  | -1.102062000 | H | -7.052402000 | -2.802632000 | 2.293650000  |
| C  | 3.154216000  | 1.730365000  | 1.372375000  | H | -6.623418000 | -3.775972000 | -1.875394000 |
| N  | 2.510891000  | 1.659856000  | 2.551655000  | H | -7.306261000 | -4.428411000 | 0.427494000  |
| H  | 2.214378000  | 0.728919000  | 2.887854000  | C | 5.893329000  | -0.757626000 | 0.157924000  |
| N  | -2.640014000 | 2.029332000  | -2.301690000 | C | 7.077536000  | -3.166001000 | -0.687358000 |
| H  | -2.280574000 | 1.175592000  | -2.759692000 | C | 6.280009000  | -0.935469000 | -1.176518000 |
| O  | -3.475897000 | 2.803051000  | -0.305739000 | C | 6.108779000  | -1.806863000 | 1.063842000  |
| O  | 3.383332000  | 2.763333000  | 0.734073000  | C | 6.695398000  | -3.001078000 | 0.646249000  |
| C  | -2.259667000 | 3.334479000  | -2.833203000 | C | 6.869351000  | -2.129571000 | -1.597794000 |
| H  | -2.644662000 | 3.408339000  | -3.857117000 | H | 6.124706000  | -0.128930000 | -1.889745000 |
| H  | -2.783208000 | 4.075413000  | -2.221698000 | H | 5.813831000  | -1.686624000 | 2.104086000  |
| C  | 2.080438000  | 2.851324000  | 3.281827000  | H | 6.856540000  | -3.801426000 | 1.363398000  |
| H  | 2.627118000  | 3.694352000  | 2.853236000  | H | 7.167338000  | -2.246852000 | -2.636494000 |
| H  | 2.402057000  | 2.730143000  | 4.322817000  | H | 7.537871000  | -4.095055000 | -1.012685000 |

### Optimized structure for 3c

|   |              |              |              |   |               |               |              |
|---|--------------|--------------|--------------|---|---------------|---------------|--------------|
| C | -2.249842000 | -0.010792000 | -2.198060000 | C | -0.791280000  | 6.580548000   | -4.165933000 |
| H | -2.241379000 | 1.117102000  | -2.047742000 | H | -0.797186000  | 5.798430000   | -3.374810000 |
| H | -3.116224000 | -0.214351000 | -2.870553000 | H | -1.390913000  | 7.415123000   | -3.756184000 |
| C | 2.775680000  | -0.166970000 | -2.097175000 | C | -0.037693000  | -4.403822000  | 4.612458000  |
| H | 3.624497000  | -0.804182000 | -2.449169000 | H | -0.345031000  | -4.711648000  | 3.593147000  |
| H | 2.701648000  | -0.413541000 | -0.991606000 | C | 1.420278000   | -3.930707000  | 4.597460000  |
| N | 3.116186000  | 1.263190000  | -2.240265000 | H | 1.697958000   | -3.506094000  | 5.580514000  |
| N | 3.220535000  | 3.456761000  | -1.844413000 | H | 1.534964000   | -3.100896000  | 3.870764000  |
| N | -2.497955000 | -0.651640000 | -0.888949000 | H | -0.127182000  | -5.318000000  | 5.234405000  |
| N | -2.622325000 | -0.962195000 | 1.317399000  | C | 2.391233000   | -5.057798000  | 4.220385000  |
| C | 3.898898000  | 1.836021000  | -3.254029000 | H | 1.970025000   | -5.668905000  | 3.399575000  |
| H | 4.340108000  | 1.264966000  | -4.056215000 | H | 3.316668000   | -4.613575000  | 3.790569000  |
| C | 3.969552000  | 3.201744000  | -3.003833000 | C | -1.463121000  | 6.025845000   | -5.430104000 |
| H | 4.463586000  | 4.000897000  | -3.563038000 | H | -1.527427000  | 6.811782000   | -6.205479000 |
| C | 2.703105000  | 2.260065000  | -1.381790000 | H | -0.839236000  | 5.220075000   | -5.862172000 |
| H | 2.087205000  | 2.106122000  | -0.477636000 | C | 2.744184000   | -5.954372000  | 5.413856000  |
| C | -2.237443000 | -0.069899000 | 0.333990000  | H | 3.209200000   | -5.347454000  | 6.214186000  |
| H | -1.843003000 | 0.953100000  | 0.484891000  | H | 1.821736000   | -6.379104000  | 5.853027000  |
| C | -3.034288000 | -1.932452000 | -0.673790000 | C | 3.695292000   | -7.085096000  | 4.998775000  |
| H | -3.302040000 | -2.604905000 | -1.473857000 | H | 3.232526000   | -7.689912000  | 4.195363000  |
| C | -3.123679000 | -2.120241000 | 0.700354000  | H | 4.615165000   | -6.655778000  | 4.555039000  |
| H | -3.498319000 | -2.970679000 | 1.271997000  | C | 4.056718000   | -7.983352000  | 6.189055000  |
| C | 1.478677000  | -0.495375000 | -2.788248000 | H | 3.136140000   | -8.407725000  | 6.633433000  |
| C | -0.946152000 | -1.167812000 | -4.015205000 | H | 4.526025000   | -7.377523000  | 6.987882000  |
| C | 1.479022000  | -1.201107000 | -3.998720000 | C | 5.003592000   | -9.115667000  | 5.768918000  |
| C | 0.266891000  | -0.121537000 | -2.190697000 | H | 5.925201000   | -8.689616000  | 5.327226000  |
| C | -0.945070000 | -0.455239000 | -2.807143000 | H | 4.536601000   | -9.717619000  | 4.965703000  |
| C | 0.265274000  | -1.536279000 | -4.606022000 | C | -2.862777000  | 5.484114000   | -5.110820000 |
| H | 2.418204000  | -1.500624000 | -4.462842000 | H | -3.513510000  | 6.305719000   | -4.757071000 |
| H | 0.278211000  | 0.421250000  | -1.238140000 | H | -2.798201000  | 4.774723000   | -4.255181000 |
| H | 0.264138000  | -2.090815000 | -5.545046000 | C | -3.493804000  | 4.795154000   | -6.326854000 |
| H | -1.884788000 | -1.433315000 | -4.499799000 | H | -2.841854000  | 3.969272000   | -6.669774000 |
| C | 3.015981000  | 4.777724000  | -1.206947000 | H | -3.553666000  | 5.504982000   | -7.173879000 |
| H | 2.099127000  | 4.716644000  | -0.533352000 | C | -4.892430000  | 4.254785000   | -5.999073000 |
| C | -2.515366000 | -0.698263000 | 2.771177000  | H | -5.551515000  | 5.087452000   | -5.685434000 |
| C | -2.365627000 | -2.047950000 | 3.521916000  | H | -4.836792000  | 3.575133000   | -5.127086000 |
| C | 2.803748000  | 5.826346000  | -2.333188000 | C | -5.508705000  | 3.521974000   | -7.198127000 |
| N | 1.670272000  | 6.583935000  | -2.217408000 | H | -4.847231000  | 2.692422000   | -7.512670000 |
| H | 1.005176000  | 6.441656000  | -1.436450000 | H | -5.566546000  | 4.206112000   | -8.066694000 |
| N | -1.194835000 | -2.206734000 | 4.219180000  | C | -6.906072000  | 2.980458000   | -6.867737000 |
| O | -3.266866000 | -2.879273000 | 3.508771000  | H | -7.570199000  | 3.814813000   | -6.569244000 |
| O | 3.619861000  | 5.946060000  | -3.242628000 | H | -6.852347000  | 2.311347000   | -5.987808000 |
| C | -1.009157000 | -3.347423000 | 5.153778000  | C | -7.514396000  | 2.229875000   | -8.059677000 |
| H | -2.002803000 | -3.822275000 | 5.346498000  | H | -6.851158000  | 1.396680000   | -8.360498000 |
| C | 1.342176000  | 7.629711000  | -3.219780000 | H | -7.569991000  | 2.900450000   | -8.938816000 |
| H | 2.284785000  | 8.136570000  | -3.538253000 | C | -8.912845000  | 1.689219000   | -7.730165000 |
| H | 0.703100000  | 8.393581000  | -2.723870000 | H | -8.860529000  | 1.021699000   | -6.848095000 |
| C | 4.244494000  | 5.185160000  | -0.338269000 | H | -9.578771000  | 2.524559000   | -7.436897000 |
| H | 5.145899000  | 5.226914000  | -1.001924000 | C | -9.521216000  | 0.936356000   | -8.911263000 |
| C | -3.780796000 | 0.037671000  | 3.312433000  | H | -10.519622000 | 0.556796000   | -8.667077000 |
| H | -4.667746000 | -0.625597000 | 3.137183000  | H | -9.622413000  | 1.581608000   | -9.791467000 |
| H | -1.602575000 | -0.039545000 | 2.934830000  | C | 5.362616000   | -10.018554000 | 6.956660000  |
| H | -0.645701000 | -2.938998000 | 6.123737000  | H | 5.830113000   | -9.415732000  | 7.758889000  |
| C | 0.639772000  | 7.044086000  | -4.454215000 | H | 4.440623000   | -10.443783000 | 7.397670000  |
| H | 1.239661000  | 6.201882000  | -4.855721000 | C | 6.309474000   | -11.149923000 | 6.534926000  |
| H | 0.633625000  | 7.810759000  | -5.254579000 | H | 5.844473000   | -11.751226000 | 5.730289000  |

|   |              |               |              |   |              |              |              |
|---|--------------|---------------|--------------|---|--------------|--------------|--------------|
| H | 7.232566000  | -10.725236000 | 6.095697000  | C | 2.819096000  | 0.577207000  | 3.032415000  |
| C | 6.667212000  | -12.056426000 | 7.720997000  | C | 1.592936000  | -3.763300000 | 0.093120000  |
| H | 7.132847000  | -11.455400000 | 8.526422000  | F | 0.689382000  | -2.997821000 | -0.536730000 |
| H | 5.744318000  | -12.484677000 | 8.158664000  | F | 0.878713000  | -4.477235000 | 0.964558000  |
| C | 7.611816000  | -13.182719000 | 7.307158000  | F | 2.486571000  | 1.849507000  | 3.274887000  |
| H | 8.552835000  | -12.791772000 | 6.903791000  | F | 2.950705000  | 0.017019000  | 4.236194000  |
| H | 7.165438000  | -13.820351000 | 6.535698000  | F | 4.060230000  | 0.638580000  | 2.535651000  |
| H | 7.861200000  | -13.824011000 | 8.159643000  | F | 1.990974000  | -4.642626000 | -0.831011000 |
| H | -8.905774000 | 0.078370000   | -9.203905000 | O | 1.632295000  | 0.523923000  | 0.688698000  |
| C | -3.993748000 | 1.368255000   | 2.594848000  | O | 0.364660000  | -0.271371000 | 2.653213000  |
| H | -3.118249000 | 2.027627000   | 2.660930000  | O | 3.582878000  | -2.136360000 | -0.335889000 |
| H | -4.830298000 | 1.924547000   | 3.040466000  | O | 3.772944000  | -3.731289000 | 1.576622000  |
| H | -4.238010000 | 1.244678000   | 1.534162000  | H | -0.407969000 | -1.553502000 | 4.102637000  |
| C | -3.619854000 | 0.257527000   | 4.818707000  | S | -2.600027000 | 3.931109000  | -0.790877000 |
| H | -2.716331000 | 0.829557000   | 5.061917000  | S | -0.827734000 | 5.747549000  | 0.876677000  |
| H | -3.581301000 | -0.688202000  | 5.373584000  | N | -1.964239000 | 4.733225000  | 0.414201000  |
| H | -4.470356000 | 0.822648000   | 5.222523000  | C | -0.461043000 | 5.131249000  | 2.575351000  |
| C | 3.992353000  | 6.575683000   | 0.247627000  | C | -4.407546000 | 4.245884000  | -0.600226000 |
| H | 4.772898000  | 6.849183000   | 0.968121000  | F | -4.765958000 | 5.511878000  | -0.823999000 |
| H | 3.032020000  | 6.631194000   | 0.780084000  | F | -4.907908000 | 3.946707000  | 0.601131000  |
| H | 3.985940000  | 7.354964000   | -0.524461000 | F | 0.542202000  | 5.798512000  | 3.158299000  |
| C | 4.482239000  | 4.164215000   | 0.774309000  | F | -1.478911000 | 5.219426000  | 3.433595000  |
| H | 5.316981000  | 4.474770000   | 1.417433000  | F | -0.082002000 | 3.848876000  | 2.615412000  |
| H | 4.736042000  | 3.171161000   | 0.391257000  | F | -5.138701000 | 3.523441000  | -1.460374000 |
| H | 3.608624000  | 4.060090000   | 1.431113000  | O | 0.425581000  | 5.524324000  | 0.133954000  |
| S | 2.996239000  | -2.790151000  | 0.825830000  | O | -1.231694000 | 7.116785000  | 1.015677000  |
| S | 1.626598000  | -0.279689000  | 1.918049000  | O | -2.245708000 | 4.417945000  | -2.104606000 |
| N | 2.219582000  | -1.720800000  | 1.733490000  | O | -2.493628000 | 2.471786000  | -0.624388000 |

### Optimized structure for 5c

|   |              |              |              |    |              |              |              |
|---|--------------|--------------|--------------|----|--------------|--------------|--------------|
| C | 0.663594000  | -0.133211000 | 2.469995000  | C  | 0.072601000  | 0.443552000  | 1.208264000  |
| H | 1.729482000  | 0.082012000  | 2.546803000  | C  | -1.721378000 | 1.540525000  | 0.004301000  |
| H | 0.192686000  | 0.313606000  | 3.353757000  | H  | -1.450948000 | 1.805708000  | -2.107087000 |
| C | 1.013024000  | 0.636342000  | -2.501726000 | H  | 1.753067000  | -0.142684000 | 0.005362000  |
| H | 0.523111000  | 1.187184000  | -3.314307000 | H  | -2.706736000 | 2.001275000  | 0.001302000  |
| H | 1.019297000  | -0.411489000 | -2.797181000 | H  | -1.773123000 | 1.129393000  | 2.110344000  |
| N | 2.383986000  | 1.138563000  | -2.396608000 | Br | 4.449265000  | -0.608418000 | 1.528845000  |
| N | 4.536129000  | 1.150084000  | -2.166285000 | Br | 1.762061000  | -3.083735000 | -1.890354000 |
| N | 0.438849000  | -1.576550000 | 2.490602000  | C  | 5.915290000  | 0.679071000  | -1.839138000 |
| N | 0.725643000  | -3.686929000 | 2.109195000  | H  | 5.830685000  | -0.230393000 | -1.235828000 |
| C | 2.808933000  | 2.420704000  | -2.684476000 | C  | 1.257283000  | -4.938227000 | 1.497018000  |
| H | 2.082162000  | 3.164555000  | -2.956897000 | C  | 0.059392000  | -5.661356000 | 0.823198000  |
| C | 4.167021000  | 2.425721000  | -2.558639000 | C  | 6.613977000  | 1.783574000  | -0.997355000 |
| H | 4.922917000  | 3.180688000  | -2.691168000 | N  | 6.355267000  | 1.731657000  | 0.351883000  |
| C | 3.439323000  | 0.382184000  | -2.039328000 | H  | 5.749987000  | 0.980215000  | 0.722137000  |
| H | 3.421938000  | -0.655912000 | -1.728394000 | N  | -0.219630000 | -5.239037000 | -0.456102000 |
| C | 1.202620000  | -2.463265000 | 1.824262000  | H  | 0.396160000  | -4.542904000 | -0.907034000 |
| H | 2.042978000  | -2.244243000 | 1.177771000  | O  | -0.657876000 | -6.455548000 | 1.434844000  |
| C | -0.545864000 | -2.246555000 | 3.189331000  | O  | 7.251510000  | 2.701978000  | -1.516423000 |
| H | -1.254223000 | -1.682662000 | 3.768546000  | C  | -1.445728000 | -5.569838000 | -1.145021000 |
| C | -0.365512000 | -3.577529000 | 2.952379000  | H  | -1.672569000 | -6.626762000 | -0.967503000 |
| H | -0.880221000 | -4.468920000 | 3.267155000  | C  | 6.680413000  | 2.808087000  | 1.260544000  |
| C | 0.265558000  | 0.836578000  | -1.205350000 | H  | 7.696661000  | 3.154750000  | 1.043661000  |
| C | -1.190031000 | 1.045308000  | 1.196497000  | H  | 6.669263000  | 2.396418000  | 2.274991000  |
| C | -1.001341000 | 1.434134000  | -1.188641000 | C  | 6.706511000  | 0.356642000  | -3.129326000 |
| C | 0.782667000  | 0.347878000  | 0.002258000  | H  | 6.855463000  | 1.277663000  | -3.707256000 |

|   |              |              |              |   |               |              |              |
|---|--------------|--------------|--------------|---|---------------|--------------|--------------|
| C | 1.953637000  | -5.822755000 | 2.556291000  | H | -1.373945000  | 6.794886000  | 0.441275000  |
| H | 1.219008000  | -6.153341000 | 3.301386000  | H | -1.376808000  | 6.839337000  | 2.206106000  |
| H | 1.988608000  | -4.662894000 | 0.731553000  | C | -3.003478000  | 5.703866000  | 1.348214000  |
| H | -1.270359000 | -5.433723000 | -2.217103000 | H | -3.182367000  | 5.099787000  | 2.246089000  |
| C | 5.702485000  | 3.981010000  | 1.145688000  | H | -3.177834000  | 5.053959000  | 0.481921000  |
| H | 5.780670000  | 4.428602000  | 0.147353000  | C | -3.985449000  | 6.875799000  | 1.314947000  |
| H | 5.994468000  | 4.754595000  | 1.865830000  | H | -3.806237000  | 7.480138000  | 0.417336000  |
| C | 4.249294000  | 3.567102000  | 1.397436000  | H | -3.812156000  | 7.525281000  | 2.181654000  |
| H | 3.946407000  | 2.811775000  | 0.663610000  | C | -5.433693000  | 6.387115000  | 1.322449000  |
| H | 4.161936000  | 3.108743000  | 2.389818000  | H | -5.613100000  | 5.740329000  | 0.455720000  |
| C | -2.622246000 | -4.708011000 | -0.675785000 | H | -5.619286000  | 5.785762000  | 2.220026000  |
| H | -2.791838000 | -4.864194000 | 0.396400000  | C | -6.413848000  | 7.548842000  | 1.289081000  |
| C | -2.403655000 | -3.213733000 | -0.941421000 | H | -7.443094000  | 7.176645000  | 1.295049000  |
| H | -2.281010000 | -3.042928000 | -2.017678000 | H | -6.282352000  | 8.198240000  | 2.160473000  |
| H | -1.473740000 | -2.888617000 | -0.460634000 | C | -9.641938000  | -0.942175000 | -1.546843000 |
| H | -3.522483000 | -5.050455000 | -1.197644000 | H | -9.506180000  | -0.830221000 | -2.629452000 |
| C | -3.528617000 | -2.326065000 | -0.402575000 | H | -9.999440000  | -1.963843000 | -1.369664000 |
| H | -3.649297000 | -2.497972000 | 0.673970000  | C | -10.688570000 | 0.059219000  | -1.055570000 |
| H | -3.221588000 | -1.279884000 | -0.521602000 | H | -10.824361000 | -0.052507000 | 0.027089000  |
| C | 3.296659000  | 4.758847000  | 1.298503000  | H | -10.331114000 | 1.080976000  | -1.232527000 |
| H | 3.523899000  | 5.478475000  | 2.094007000  | C | -12.027965000 | -0.144342000 | -1.763237000 |
| H | 3.446183000  | 5.273655000  | 0.341634000  | H | -11.898578000 | -0.029590000 | -2.845732000 |
| C | -4.865857000 | -2.535207000 | -1.114709000 | H | -12.391857000 | -1.163112000 | -1.586049000 |
| H | -4.728819000 | -2.419783000 | -2.196590000 | C | -13.071240000 | 0.849289000  | -1.277661000 |
| H | -5.230578000 | -3.553263000 | -0.938852000 | H | -12.751973000 | 1.878629000  | -1.469661000 |
| C | -5.914573000 | -1.535268000 | -0.622021000 | H | -13.248000000 | 0.738818000  | -0.203003000 |
| H | -6.049561000 | -1.648590000 | 0.460563000  | H | -14.020876000 | 0.685787000  | -1.796669000 |
| H | -5.558886000 | -0.512732000 | -0.798291000 | H | -6.276123000  | 8.152534000  | 0.386350000  |
| C | -7.254783000 | -1.739651000 | -1.330136000 | C | 3.051917000   | -5.048114000 | 3.293442000  |
| H | -7.611948000 | -2.761412000 | -1.152919000 | H | 3.797076000   | -4.654400000 | 2.593780000  |
| H | -7.119044000 | -1.627627000 | -2.412727000 | H | 3.569624000   | -5.695121000 | 4.009851000  |
| C | -8.301549000 | -0.738453000 | -0.838710000 | H | 2.637044000   | -4.207210000 | 3.857773000  |
| H | -7.944151000 | 0.283280000  | -1.015755000 | C | 2.569896000   | -7.069859000 | 1.911834000  |
| H | -8.437242000 | -0.850539000 | 0.243890000  | H | 3.308776000   | -6.797950000 | 1.150169000  |
| C | 1.840344000  | 4.303432000  | 1.405857000  | H | 1.807751000   | -7.694524000 | 1.436140000  |
| H | 1.690784000  | 3.758678000  | 2.346066000  | H | 3.073126000   | -7.686429000 | 2.664519000  |
| H | 1.617317000  | 3.605173000  | 0.589800000  | C | 8.085813000   | -0.225090000 | -2.796557000 |
| C | 0.876402000  | 5.488573000  | 1.341981000  | H | 8.638678000   | -0.459901000 | -3.712625000 |
| H | 1.056051000  | 6.062539000  | 0.424832000  | H | 7.995649000   | -1.147012000 | -2.211787000 |
| H | 1.064769000  | 6.160920000  | 2.187612000  | H | 8.693198000   | 0.481363000  | -2.222772000 |
| C | -0.577016000 | 5.015447000  | 1.370409000  | C | 5.952267000   | -0.635121000 | -4.021987000 |
| H | -0.752694000 | 4.414954000  | 2.271205000  | H | 6.550759000   | -0.901165000 | -4.900063000 |
| H | -0.762222000 | 4.367493000  | 0.506211000  | H | 5.014713000   | -0.206780000 | -4.389587000 |
| C | -1.553397000 | 6.191216000  | 1.339195000  | H | 5.718138000   | -1.557878000 | -3.480310000 |
